# Supplementary material for: Combining visible light catalysis and transfer hydrogenation for in situ efficient and selective semihydrogenation of alkynes under ambient conditions
Source: Royal Society of Chemistry journal article supplement (doi:10.1039/c5cc08697c), 2015-11-12

## Supporting Information for

### **Combining Visible Light Catalysis and Transfer Hydrogenation for *in situ* Efficient and Selective Semihydrogenation of Alkynes under Ambient Condition**

Jian-Ji Zhong<sup>†</sup>, Qiang Liu<sup>†</sup>, Cheng-Juan Wu, Qing-Yuan Meng, Xue-Wang Gao, Zhi-Jun Li, Bin Chen, Chen-Ho Tung, Li-Zhu Wu\*

Key Laboratory of Photochemical Conversion and Optoelectronic Materials,  
Technical Institute of Physics and Chemistry & University of the Chinese Academy  
of Sciences, Chinese Academy of Sciences, Beijing 100190, P. R. China

*Email: [lzhu@mail.ipc.ac.cn](mailto:lzhu@mail.ipc.ac.cn)*

#### **Table of Contents**

|                                                      |     |
|------------------------------------------------------|-----|
| 1 Experimental details                               | S2  |
| 2 Characterization data for all compounds            | S10 |
| 3 <sup>1</sup> H NMR and <sup>13</sup> C NMR spectra | S15 |

## Experimental details

### a) General information

Unless stated otherwise, all reactions were carried out under Argon.  $^1\text{H}$  NMR spectra were recorded using a Bruker Avance DPX 400 MHz instrument with tetramethylsilane (TMS) as an internal standard. Multiplicities are indicated, s (singlet), d (doublet), t (triplet), q (quartet), m (multiplet); coupling constants ( $J$ ) are in Hertz (Hz).  $^{13}\text{C}$  NMR spectra were obtained at 100 MHz and referenced to the internal solvent signals.  $^{19}\text{F}$  NMR spectra were recorded on a Bruker Avance DPX 400 MHz spectrometer ( $\text{CFCl}_3$  as an external reference (0 ppm)). High resolution mass spectra were recorded using a Trio-2000 GC-MS spectrometer. Hydrogen content was analyzed by gas chromatography (7890-II, Tianmei, China, TCD, nitrogen as a carrier gas and 5 Å molecular sieve column, a thermal conductivity detector). Commercially available reagents and solvents were used without further purification unless indicated otherwise. Irradiation with green light was performed using green LEDs (3W,  $\lambda = 525 \pm 10$  nm, 145 lm @700mA).

### b) Method for the synthesis of colloidal Pd nanoparticle aqueous solution.

A solution of  $5.0 \times 10^{-4}$  M  $\text{K}_2\text{PdCl}_4$  was prepared in 100 mL water, to which we added 2.0 mL  $1.0 \times 10^{-2}$  M sodium polyacrylate (MW = 3000). Ar gas was bubbled through the solution for 20 min. Then a high flow rate of  $\text{H}_2$  (150 mL/min) was bubbling through the solution for 5 min. The reaction vessel was then sealed, and the solution was left for about 5~6 h until the solution turned lightly dark. The lightly dark solution could be used for the reaction and it would be stable for about two months.

### c) General procedure for the semihydrogenation of alkynes by visible light catalysis.

The corresponding alkynes **1** in 1.5 mL  $\text{CH}_3\text{CN}$  (0.1 mmol, 1 equiv.), TEOA (0.3 mmol, 3 equiv.), eosin Y (0.003 mmol, 3 mol %), colloidal Pd nanoparticle aqueous solution (4.0 mL,  $5.0 \times 10^{-4}$  M), were dissolved in a 15 mL reaction tube equipped with magnetic stirring bar, the reaction tube was sealed and the resulting mixed solution was strictly degassed with argon for 15 minutes, then reaction tube was irradiated by green LEDs for 2 h. After reaction, the organic layer was extracted with diethyl ether ( $3 \times 5$  mL). The combined organic phases were washed with brine and dried over sodium sulphate. The solvent was removed by rotary evaporation and purified by column chromatography on

silica gel using hexane/ethyl acetate (100:1) as eluent.

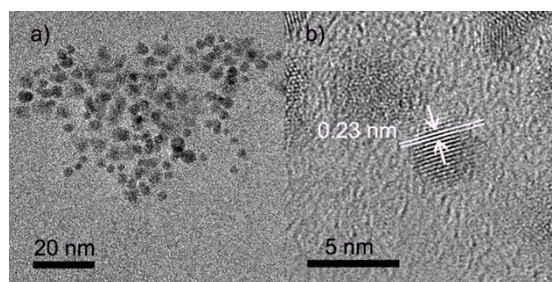

**Figure S1.** TEM images of colloidal Pd nanoparticle.

**Table S1.** Optimization of reaction conditions.<sup>a</sup>

| entry          | TEOA<br>(eq.) | eosin Y<br>(%) | solvent                             | con.<br>[%] | yield (%) |            |        |
|----------------|---------------|----------------|-------------------------------------|-------------|-----------|------------|--------|
|                |               |                |                                     |             | alkene    | <i>E/Z</i> | alkane |
| 1              | --            | 3%             | H <sub>2</sub> O/CH <sub>3</sub> CN | --          | --        | --         | --     |
| 2              | 3.0 eq.       | --             | H <sub>2</sub> O/CH <sub>3</sub> CN | --          | --        | --         | --     |
| 3 <sup>b</sup> | 3.0 eq.       | 3%             | H <sub>2</sub> O/CH <sub>3</sub> CN | --          | --        | --         | --     |
| 4 <sup>c</sup> | 3.0 eq.       | 3%             | H <sub>2</sub> O/CH <sub>3</sub> CN | --          | --        | --         | --     |

<sup>a</sup> Reaction conditions: 0.1 mmol 1,2-diphenylacetylene **1a** in 1.5 mL CH<sub>3</sub>CN, 4 mL colloidal Pd nanoparticle aqueous solution ( $5.0 \times 10^{-4}$  M), degassed by bubbling Ar gas, 2 h irradiation under 525 nm green LEDs; <sup>b</sup> no light; <sup>c</sup> no colloidal Pd nanoparticle.

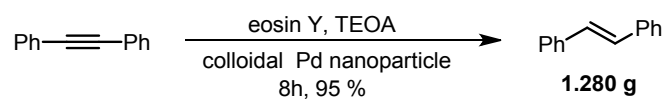

**Scheme S1.** Gram-scale reaction (Reaction conditions: 7.5 mmol alkynes **1a** in 60 mL CH<sub>3</sub>CN, 3.0 eq. TEOA, 2 % eosin Y, 160 mL colloidal Pd nanoparticle aqueous solution ( $5.0 \times 10^{-4}$  M), 525 nm green LEDs, 18 h irradiation at room temperature and pressure ).

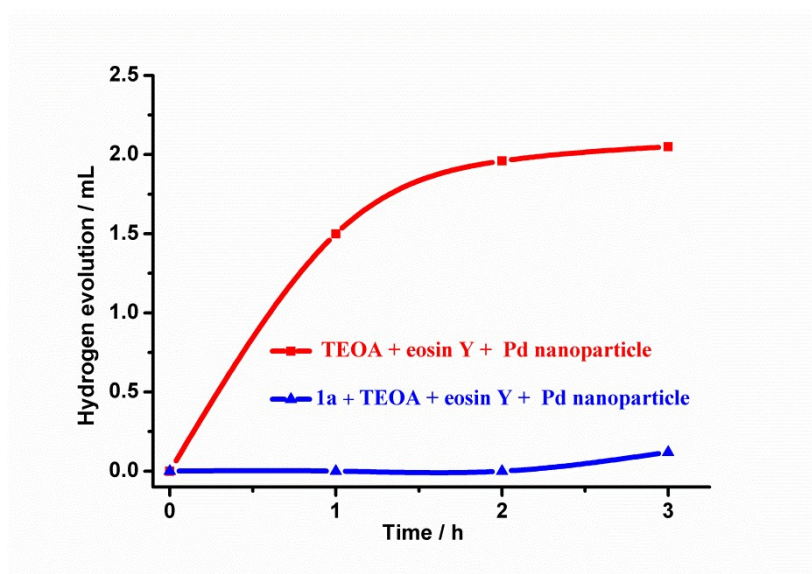

**Figure S2.** Hydrogen evolution performance in the system with (blue) and without (red) **1a**.

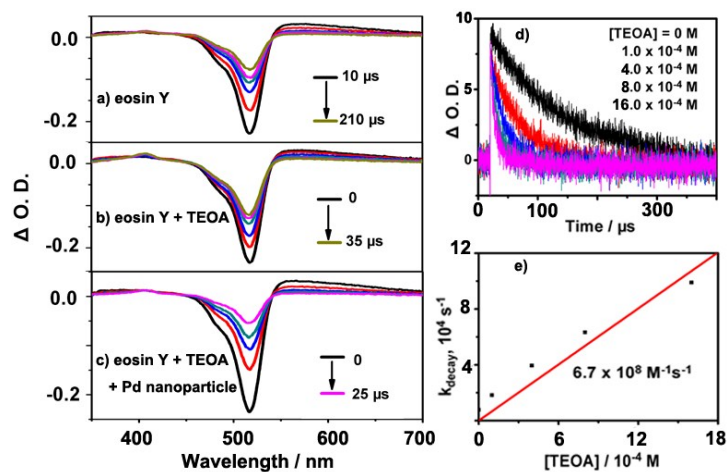

**Figure S3.** Transient absorption spectra observed after laser excitation ( $\lambda_{ex} = 532$  nm) of system containing a) eosin Y ( $1.0 \times 10^{-5}$  M), b) eosin Y ( $1.0 \times 10^{-5}$  M), TEOA ( $1.0 \times 10^{-3}$  M), c) eosin Y ( $1 \times 10^{-5}$  M), TEOA ( $1.0 \times 10^{-3}$  M), colloidal Pd nanoparticle aqueous solution ( $5.0 \times 10^{-4}$  M). d) Transient absorbance time profiles at 560 nm due to  $^3[\text{eosin Y}]^*$  in the absence and presence of TEOA after laser excitation ( $\lambda_{ex} = 532$  nm). e) plot of  $k_{decay}$  versus [TEOA] for the reaction of  $^3[\text{eosin Y}]^*$  with TEOA.



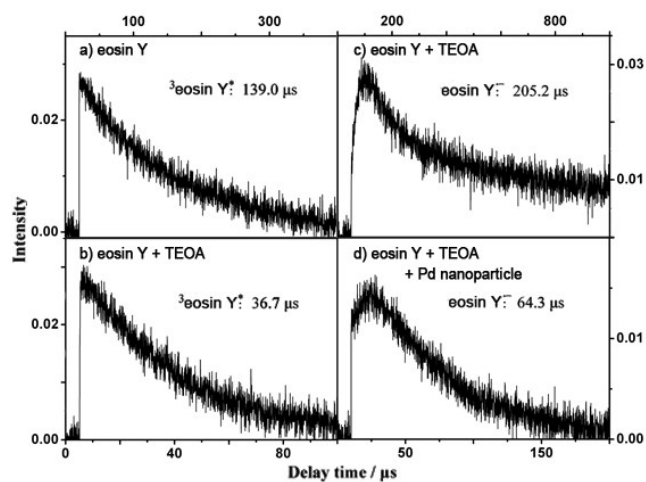

**Figure S4.** Decay profiles at a) 560 nm of eosin Y ( $1.0 \times 10^{-5}$  M); b) 560 nm of eosin Y ( $1.0 \times 10^{-5}$  M), TEOA ( $1.0 \times 10^{-3}$  M); c) 410 nm of eosin Y ( $1.0 \times 10^{-5}$  M), TEOA ( $1.0 \times 10^{-3}$  M); d) 410 nm of eosin Y ( $1.0 \times 10^{-5}$  M), TEOA ( $1.0 \times 10^{-3}$  M), colloidal Pd nanoparticle ( $5.0 \times 10^{-4}$  M).

## Characterization data of the products

### (*E*)-1,2-Diphenylethylene

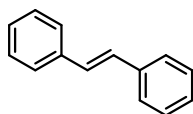

Purified by column chromatography on silica gel (eluting with hexane/ethyl acetate = 100:1,  $R_f$  = 0.9),  $E/Z$  = 95:5.  $^1\text{H}$  NMR (400 MHz,  $\text{CDCl}_3$ )  $\delta$  = 7.57 – 7.49 (m, 4H), 7.37 (dd,  $J$  = 10.4, 4.8 Hz, 4H), 7.30 – 7.24 (m, 2H), 7.12 (s, 2H).  $^{13}\text{C}$  NMR (100 MHz,  $\text{CDCl}_3$ )  $\delta$  = 138.3, 129.6, 129.7, 128.5, 127.4. HRMS (EI<sup>+</sup>HR) calcd. for  $\text{C}_{14}\text{H}_{12}$ : 180.0939, found: 180.0939.

### (*E*)-1-(4-fluorophenyl)-2-phenylethene

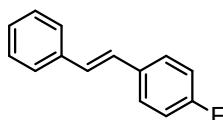

Purified by column chromatography on silica gel (eluting with hexane/ethyl acetate = 100:1,  $R_f$  = 0.9),  $E/Z$  = 95:5.  $^1\text{H}$  NMR (400 MHz,  $\text{CDCl}_3$ )  $\delta$  = 7.55 – 7.45 (m, 4H), 7.37 (t,  $J$  = 7.6 Hz, 2H), 7.30 – 7.24 (m, 1H), 7.13 – 6.98 (m, 4H).  $^{13}\text{C}$  NMR (100 MHz,  $\text{CDCl}_3$ )  $\delta$  = 163.6-161.1 (d,  $J$  = 250 Hz), 137.2, 133.5, 128.7, 128.5, 127.9, 127.7, 127.5, 126.5, 115.7.  $^{19}\text{F}$  NMR (376 MHz,  $\text{CDCl}_3$ )  $\delta$  = -114.3. HRMS (EI<sup>+</sup>HR) calcd. for  $\text{C}_{14}\text{H}_{11}\text{F}$ : 198.0845, found: 198.0850.

### (*E*)-1-(4-chloridephenyl)-2-phenylethene

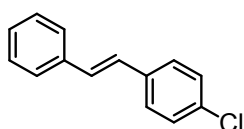

Purified by column chromatography on silica gel (eluting with hexane/ethyl acetate = 100:1,  $R_f$  = 0.9),  $E/Z$  = 95:5.  $^1\text{H}$  NMR (400 MHz,  $\text{CDCl}_3$ )  $\delta$  = 7.50 (d,  $J$  = 7.5 Hz, 2H), 7.43 (d,  $J$  = 8.5 Hz, 2H), 7.33 (dt,  $J$  = 16.8, 7.8 Hz, 5H), 7.06 (s, 2H).  $^{13}\text{C}$  NMR (100 MHz,  $\text{CDCl}_3$ )  $\delta$  = 137.0, 135.9, 133.2, 129.3, 128.8, 128.7, 127.9, 127.7, 127.4, 126.6. HRMS (EI<sup>+</sup>HR) calcd. for  $\text{C}_{14}\text{H}_{11}\text{Cl}$ : 214.0549, found: 214.0546.

### (*E*)-1-(4-bromidephenyl)-2-phenylethene

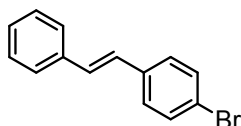

Purified by column chromatography on silica gel (eluting with hexane/ethyl acetate = 100:1,  $R_f$  = 0.9),  $E/Z$  = 95:5.  $^1\text{H}$  NMR (400 MHz,  $\text{CDCl}_3$ )  $\delta$  = 7.58 – 7.50 (m, 4H), 7.40 – 7.27 (m, 4H), 7.33 – 7.29 (m, 1H), 7.09 (dd,  $J$  = 28.3, 16.4 Hz, 2H).  $^{13}\text{C}$  NMR (100 MHz,  $\text{CDCl}_3$ )  $\delta$  = 136.9, 136.3, 133.0, 131.8, 129.4, 128.7, 128.0, 127.6, 126.5, 121.3. HRMS ( $\text{EI}^+\text{HR}$ ) calcd. for  $\text{C}_{14}\text{H}_{11}\text{Br}$ : 258.0044, found: 258.0046.

**(*E*)-1,2-Di-(4-chlorophenyl)ethylene**

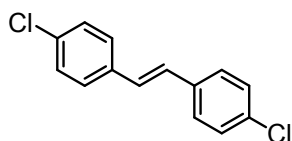

Purified by column chromatography on silica gel (eluting with hexane/ethyl acetate = 100:1,  $R_f$  = 0.9),  $E/Z$  = 95:5.  $^1\text{H}$  NMR (400 MHz,  $\text{CDCl}_3$ )  $\delta$  = 7.43 (d,  $J$  = 8.5 Hz, 4H), 7.33 (d,  $J$  = 8.5 Hz, 4H), 7.03 (s, 2H).  $^{13}\text{C}$  NMR (100 MHz,  $\text{CDCl}_3$ )  $\delta$  = 136.4, 134.4, 129.8, 128.9, 128.6. HRMS ( $\text{EI}^+\text{HR}$ ) calcd. for  $\text{C}_{14}\text{H}_{10}\text{Cl}_2$ : 248.0160, found: 248.0161.

**(*E*)-1-(4-cyanophenyl)-2-phenylethene**

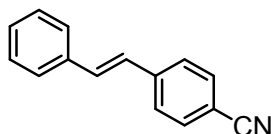

Purified by column chromatography on silica gel (eluting with hexane/ethyl acetate = 100:1,  $R_f$  = 0.9),  $E/Z$  = 95:5.  $^1\text{H}$  NMR (400 MHz,  $\text{CDCl}_3$ )  $\delta$  = 7.65 (d,  $J$  = 8.4 Hz, 2H), 7.60 (d,  $J$  = 8.4 Hz, 2H), 7.55 (d,  $J$  = 7.4 Hz, 2H), 7.41 (t,  $J$  = 7.4 Hz, 2H), 7.34 (dd,  $J$  = 8.3, 6.3 Hz, 1H), 7.24 (d,  $J$  = 16.3 Hz, 1H), 7.11 (d,  $J$  = 16.3 Hz, 1H).  $^{13}\text{C}$  NMR (100 MHz,  $\text{CDCl}_3$ )  $\delta$  = 142.8, 137.2, 133.4, 133.4, 129.8, 129.6, 127.8, 127.8, 127.7, 119.9, 111.5. HRMS ( $\text{EI}^+\text{HR}$ ) calcd. for  $\text{C}_{15}\text{H}_{11}\text{N}$ : 205.0891, found: 205.0899.

**(*E*)-1-(4-Acetylphenyl)-2-phenylethene**

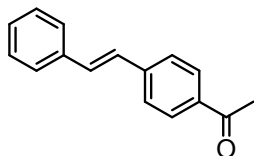

Purified by column chromatography on silica gel (eluting with hexane/ethyl acetate = 100:1,  $R_f$  = 0.8),  $E/Z$  = 95:5.  $^1\text{H}$  NMR (400 MHz,  $\text{CDCl}_3$ )  $\delta$  = 7.97 (d,  $J$  = 8.4 Hz, 2H), 7.60 (d,  $J$  = 8.4 Hz, 2H), 7.55 (d,  $J$  = 7.4 Hz, 2H), 7.39 (t,  $J$  = 7.5 Hz, 2H), 7.31 (t,  $J$  = 7.3 Hz, 1H), 7.22 (s, 1H), 7.14 (d,  $J$  = 16.3 Hz,

1H), 2.62 (s, 3H). <sup>13</sup>C NMR (100 MHz, CDCl<sub>3</sub>) δ = 198.4, 142.9, 137.6, 136.9, 132.4, 129.8, 129.7, 129.2, 128.4, 127.7, 127.4, 27.5. HRMS (EI<sup>+</sup>HR) calcd. for C<sub>16</sub>H<sub>14</sub>O: 222.1045, found: 222.1044.

**(E)-1-(4-methylphenyl)-2-phenylethene**

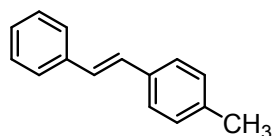

Purified by column chromatography on silica gel (eluting with hexane/ethyl acetate = 100:1, R<sub>f</sub> = 0.9), E/Z = 95:5. <sup>1</sup>H NMR (400 MHz, CDCl<sub>3</sub>) δ = 7.54 – 7.50 (m, 2H), 7.44 (d, J = 8.1 Hz, 2H), 7.37 (t, J = 7.6 Hz, 2H), 7.26 (t, J = 4.5 Hz, 1H), 7.19 (d, J = 7.9 Hz, 2H), 7.15 – 7.03 (dd, J = 16 Hz, m, 2H), 2.38 (s, 3H). <sup>13</sup>C NMR (100 MHz, CDCl<sub>3</sub>) δ = 138.5, 135.5, 130.3, 129.6, 128.6, 128.3, 127.4, 127.3, 127.2, 22.2. HRMS (EI<sup>+</sup>HR) calcd. for C<sub>15</sub>H<sub>14</sub>: 194.1096, found: 194.1106.

**(E)-1,2-Di-(4-methoxyphenyl)ethene**

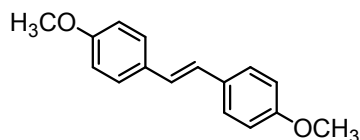

Purified by column chromatography on silica gel (eluting with hexane/ethyl acetate = 100:1, R<sub>f</sub> = 0.9), E/Z = 95:5. <sup>1</sup>H NMR (400 MHz, CDCl<sub>3</sub>) δ = 7.43 (d, J = 8.7 Hz, 4H), 6.94 (s, 2H), 6.90 (d, J = 8.7 Hz, 4H), 3.84 (s, 6H). <sup>13</sup>C NMR (100 MHz, CDCl<sub>3</sub>) δ = 159.9, 131.4, 128.3, 127.1, 115.0, 56.2. HRMS (EI<sup>+</sup>HR) calcd. for C<sub>16</sub>H<sub>16</sub>O<sub>2</sub>: 240.1150, found: 240.1153.

**(E)-1-(4-methoxyphenyl)-2-phenylethene**

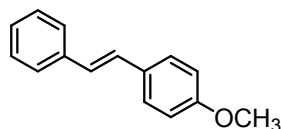

Purified by column chromatography on silica gel (eluting with hexane/ethyl acetate = 100:1, R<sub>f</sub> = 0.9), E/Z = 95:5. <sup>1</sup>H NMR (400 MHz, CDCl<sub>3</sub>) δ = 7.55 – 7.44 (m, 5H), 7.34 (d, J = 7.9 Hz, 2H), 7.08 (d, J = 16.3 Hz, 1H), 6.98 (d, J = 16.3 Hz, 1H), 6.91 (d, J = 8.8 Hz, 2H), 3.84 (s, 3H). <sup>13</sup>C NMR (100 MHz, CDCl<sub>3</sub>) δ = 134.0, 132.4, 129.6, 129.2, 128.9, 128.6, 128.1, 127.6, 127.2, 115.1, 56.3. HRMS (EI<sup>+</sup>HR) calcd. for C<sub>15</sub>H<sub>14</sub>O: 210.1045, found: 210.1044.

**(Z)-3-phenylprop-2-en-1-ol**

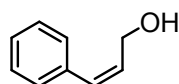

Purified by column chromatography on silica gel (eluting with hexane/ethyl acetate = 50:1,  $R_f$  = 0.7),  $E/Z$  = 5:95.  $^1\text{H}$  NMR (400 MHz,  $\text{CDCl}_3$ )  $\delta$  = 7.35 (t,  $J$  = 7.4 Hz, 2H), 7.30 – 7.26 (m, 1H), 7.21 (d,  $J$  = 7.2 Hz, 2H), 6.58 (d,  $J$  = 11.7 Hz, 1H), 5.88 (dt,  $J$  = 11.9, 6.4 Hz, 1H), 4.45 (dd,  $J$  = 6.4, 1.6 Hz, 2H), 1.59 (s, 1H).  $^{13}\text{C}$  NMR (100 MHz,  $\text{CDCl}_3$ )  $\delta$  = 137.4, 132.1, 132.0, 129.7, 129.2, 128.2, 60.6. HRMS ( $\text{EI}^+\text{HR}$ ) calcd. for  $\text{C}_9\text{H}_{10}\text{O}$ : 134.0732, found: 134.0733.

**(Z)-methyl-3-phenylacrylate**

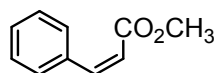

Purified by column chromatography on silica gel (eluting with hexane/ethyl acetate = 80:1,  $R_f$  = 0.8),  $E/Z$  = 5:95.  $^1\text{H}$  NMR (400 MHz,  $\text{CDCl}_3$ )  $\delta$  = 7.59 (dd,  $J$  = 7.5, 1.6 Hz, 2H), 7.43 – 7.29 (m, 3H), 6.96 (d,  $J$  = 12.6 Hz, 1H), 5.96 (d,  $J$  = 12.6 Hz, 1H), 3.71 (s, 3H).  $^{13}\text{C}$  NMR (100 MHz,  $\text{CDCl}_3$ )  $\delta$  = 167.5, 144.3, 135.7, 130.6, 130.0, 129.0, 120.2, 52.3. HRMS ( $\text{EI}^+\text{HR}$ ) calcd. for  $\text{C}_{10}\text{H}_{10}\text{O}_2$ : 162.0681, found: 162.0681.

**(Z)-ethyl-3-phenylacrylate**

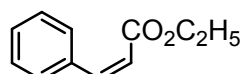

Purified by column chromatography on silica gel (eluting with hexane/ethyl acetate = 80:1,  $R_f$  = 0.8),  $E/Z$  = 5:95.  $^1\text{H}$  NMR (400 MHz,  $\text{CDCl}_3$ )  $\delta$  = 7.61 – 7.55 (m, 2H), 7.35 (d,  $J$  = 7.5 Hz, 3H), 6.95 (d,  $J$  = 12.6 Hz, 1H), 5.95 (d,  $J$  = 12.6 Hz, 1H), 4.18 (q,  $J$  = 7.1 Hz, 2H), 1.25 (t,  $J$  = 7.1 Hz, 3H).  $^{13}\text{C}$  NMR (100 MHz,  $\text{CDCl}_3$ )  $\delta$  = 167.2, 143.9, 135.8, 130.6, 129.9, 128.9, 120.8, 61.2, 15.0. HRMS ( $\text{EI}^+\text{HR}$ ) calcd. for  $\text{C}_{11}\text{H}_{12}\text{O}_2$ : 176.0837, found: 176.0835.

**(Z)-hex-1-en-1-ylbenzene**

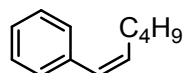

Purified by column chromatography on silica gel (eluting with hexane/ethyl acetate = 100:1,  $R_f$  = 0.9),  $E/Z$  = 5:95.  $^1\text{H}$  NMR (400 MHz,  $\text{CDCl}_3$ )  $\delta$  = 7.36 – 7.30 (m, 2H), 7.26 (dd,  $J$  = 13.7, 9.1 Hz, 3H), 6.40 (d,  $J$  = 11.6 Hz, 1H), 5.66 (dt,  $J$  = 11.6, 7.3 Hz, 1H), 2.38 – 2.27 (m, 2H), 1.46 – 1.41 (m, 2H), 1.35 (dd,

$J = 14.9, 7.3$  Hz, 2H), 0.89 (t,  $J = 7.1$  Hz, 3H).  $^{13}\text{C}$  NMR (100 MHz,  $\text{CDCl}_3$ )  $\delta = 137.9, 133.2, 128.8, 128.7, 128.5, 128.1, 126.4, 32.4, 28.4, 22.4, 14.0$ . HRMS ( $\text{EI}^+\text{HR}$ ) calcd. for  $\text{C}_{12}\text{H}_{16}$ : 160.1252, found: 160.1255.

**(Z)-1-methoxy-4-(((3-phenylallyl)oxy)methyl)benzene**

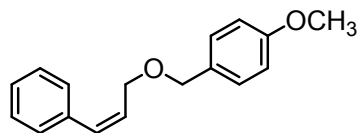

Purified by column chromatography on silica gel (eluting with hexane/ethyl acetate = 60:1,  $R_f = 0.7$ ),  $E/Z = 7:93$ .  $^1\text{H}$  NMR (400 MHz,  $\text{CDCl}_3$ )  $\delta = 7.34 - 7.31$  (m, 2H), 7.29 – 7.25 (m, 3H), 7.23 – 7.19 (m, 2H), 6.90 – 6.85 (m, 2H), 6.63 (d,  $J = 11.8$  Hz, 1H), 5.97 – 5.85 (m, 1H), 4.47 (s, 2H), 4.29 (dd,  $J = 6.4, 1.6$  Hz, 2H), 3.81 (s, 3H).  $^{13}\text{C}$  NMR (100 MHz,  $\text{CDCl}_3$ )  $\delta = 160.2, 137.6, 132.7, 131.2, 130.4, 130.0, 129.7, 129.1, 128.1, 114.7, 73.0, 67.5, 56.2$ . HRMS ( $\text{EI}^+\text{HR}$ ) calcd. for  $\text{C}_{17}\text{H}_{18}\text{O}_2$ : 254.1307, found: 254.1303.

**(Z)-dodec-9-en-1-ol**

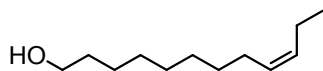

Purified by column chromatography on silica gel (eluting with hexane/ethyl acetate = 100:1,  $R_f = 0.8$ ),  $E/Z = 8:92$ .  $^1\text{H}$  NMR (400 MHz,  $\text{CDCl}_3$ )  $\delta = 5.48 - 5.26$  (m, 2H), 3.63 (t,  $J = 6.6$  Hz, 2H), 2.08 – 1.91 (m, 4H), 1.55 (dd,  $J = 14.0, 6.9$  Hz, 2H), 1.47 (s, 1H), 1.32 (d,  $J = 19.1$  Hz, 10H), 0.95 (td,  $J = 7.5, 2.7$  Hz, 3H).  $^{13}\text{C}$  NMR (100 MHz,  $\text{CDCl}_3$ )  $\delta = 132.5, 130.2, 64.0, 33.7, 30.7, 30.4, 30.3, 30.1, 28.0, 26.7, 21.4, 15.3$ . HRMS ( $\text{EI}^+\text{HR}$ ) calcd. for  $\text{C}_{12}\text{H}_{24}\text{O}$ : 184.1827, found: 184.1832.

**(Z)-dodec-9-en-1-yl propionate**

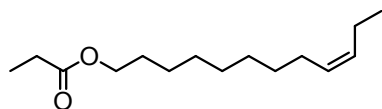

Purified by column chromatography on silica gel (eluting with hexane/ethyl acetate = 80:1,  $R_f = 0.9$ ),  $E/Z = 6:94$ .  $^1\text{H}$  NMR (400 MHz,  $\text{CDCl}_3$ )  $\delta = 5.47 - 5.26$  (m, 2H), 4.06 (t,  $J = 6.7$  Hz, 2H), 2.32 (q,  $J = 7.6$  Hz, 2H), 2.09 – 1.93 (m, 4H), 1.61 (dd,  $J = 13.7, 6.8$  Hz, 2H), 1.30 (s, 10H), 1.14 (t,  $J = 7.6$  Hz, 3H), 0.95 (t,  $J = 7.5$  Hz, 3H).  $^{13}\text{C}$  NMR (100 MHz,  $\text{CDCl}_3$ )  $\delta = 175.5, 132.5, 130.2, 65.4, 30.6, 30.3, 30.1, 30.1, 29.6, 28.6, 28.0, 26.8, 21.4, 15.3, 10.1$ . HRMS ( $\text{EI}^+\text{HR}$ ) calcd. for  $\text{C}_{15}\text{H}_{28}\text{O}_2$ : 240.2089, found: 240.2076.

# <sup>1</sup>H NMR and <sup>13</sup>C NMR spectra

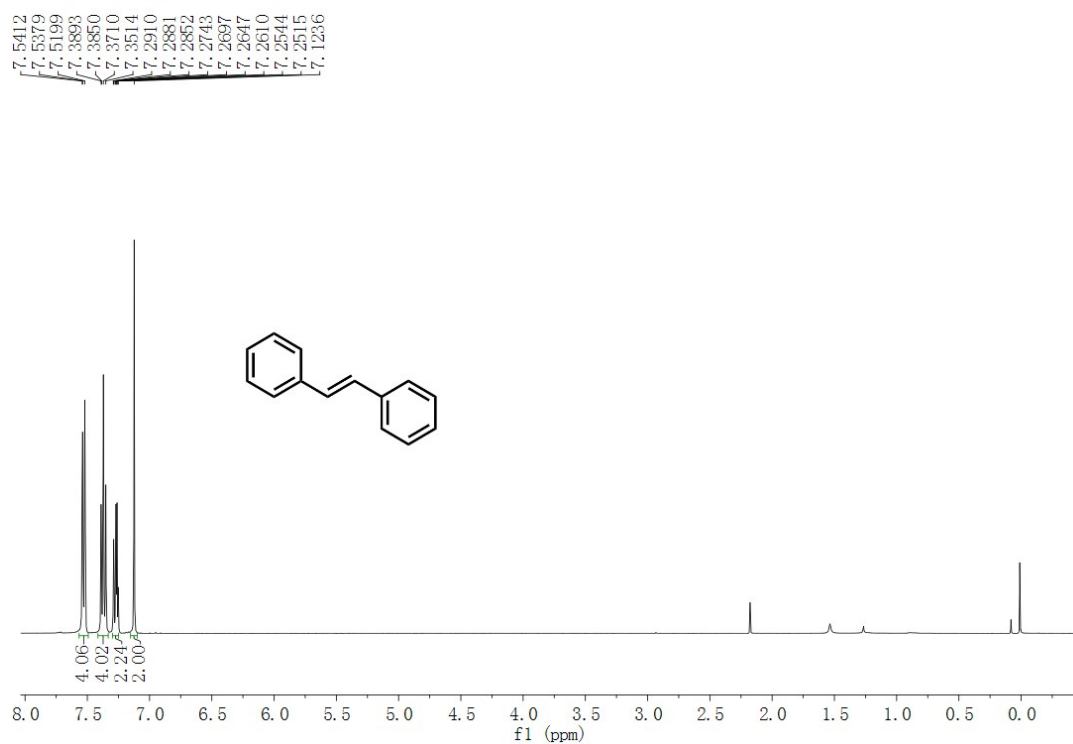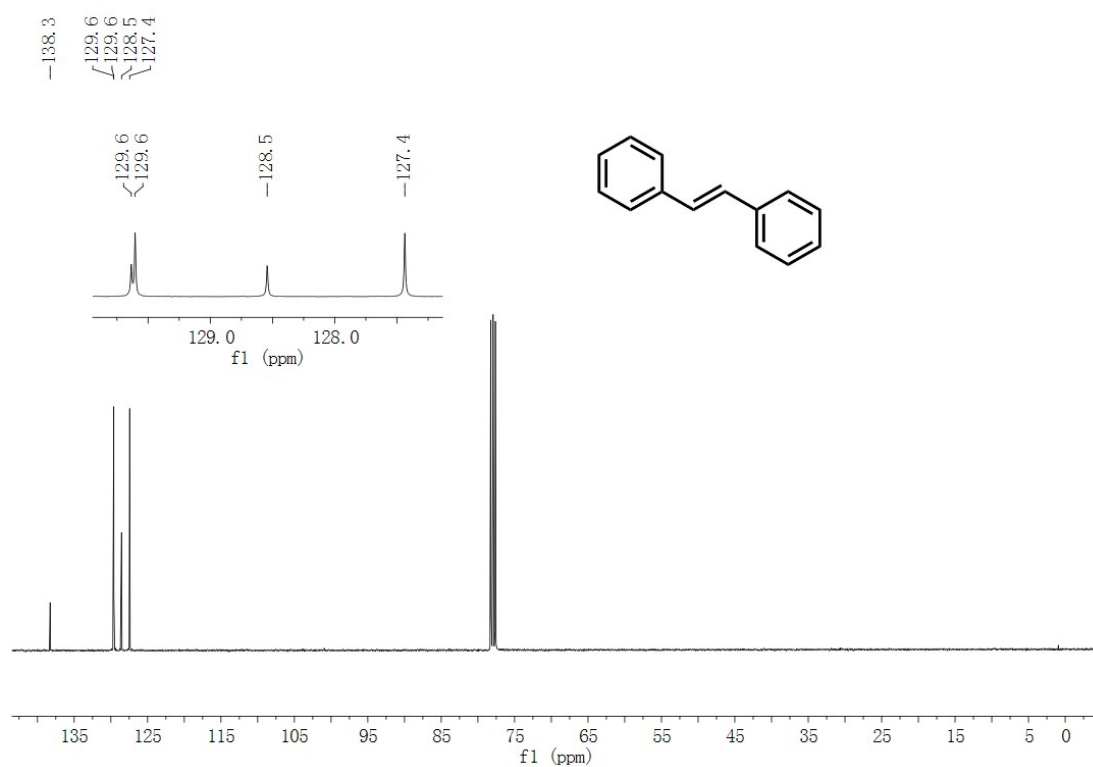

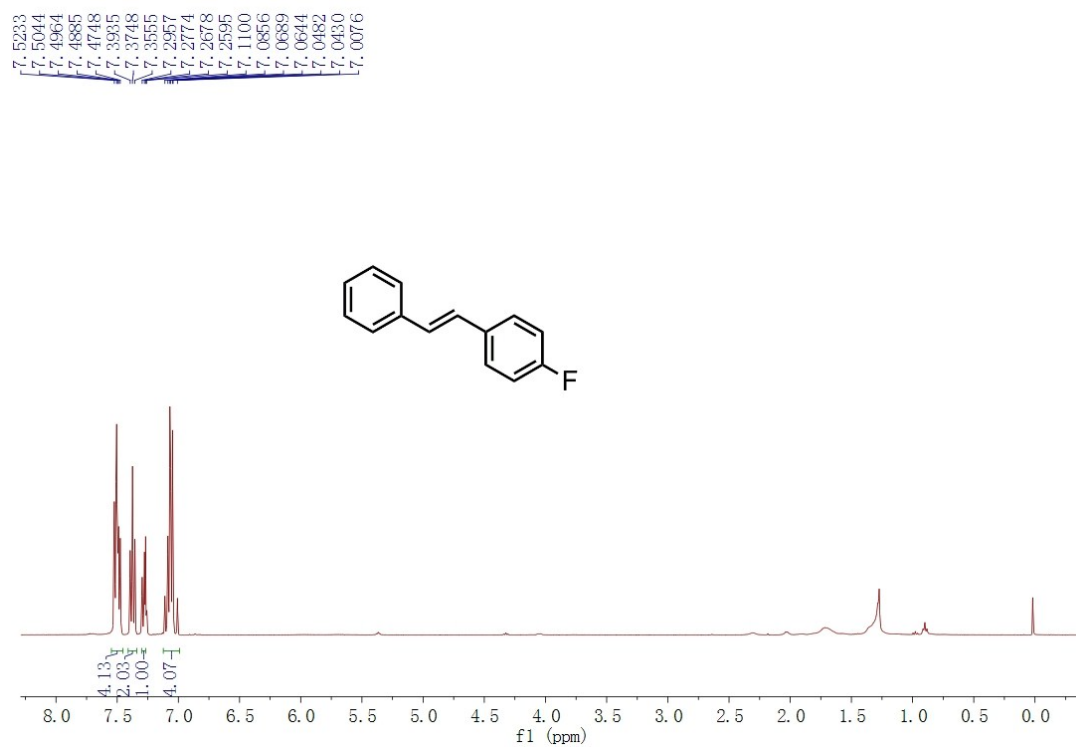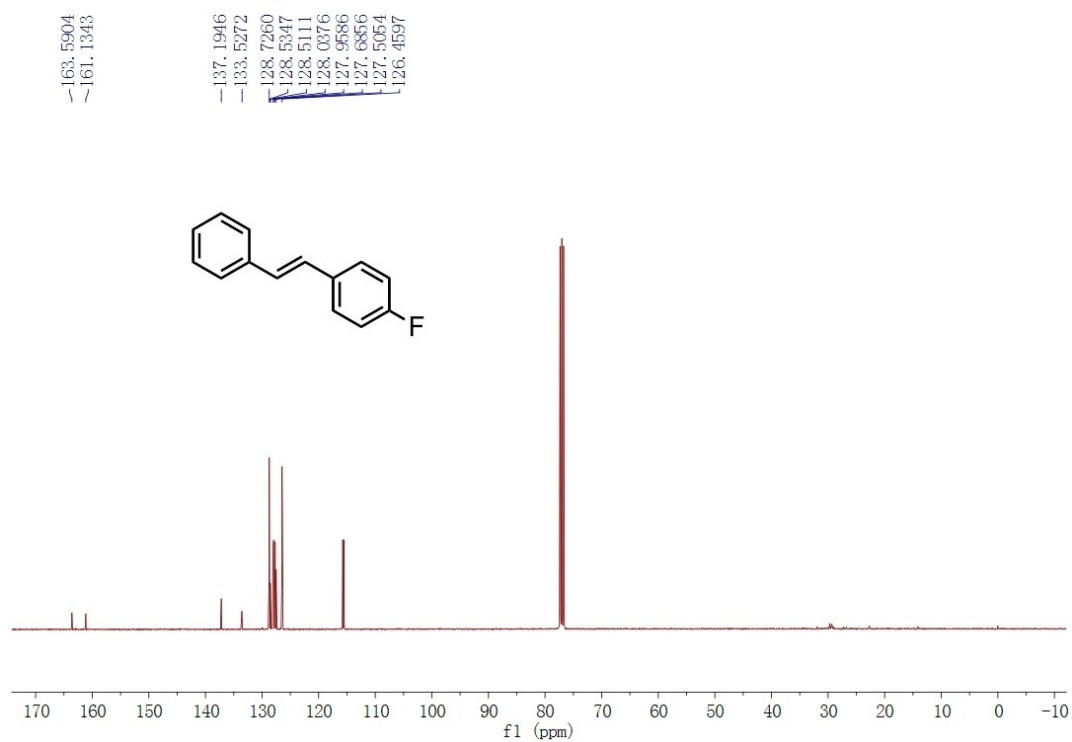



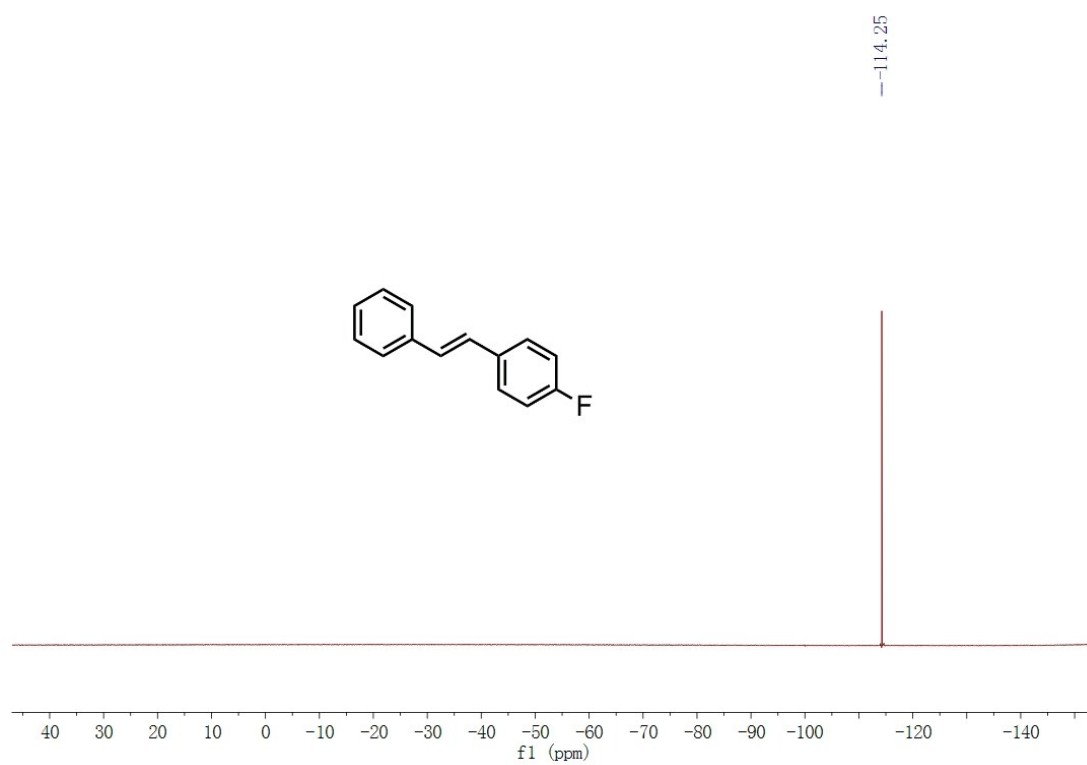

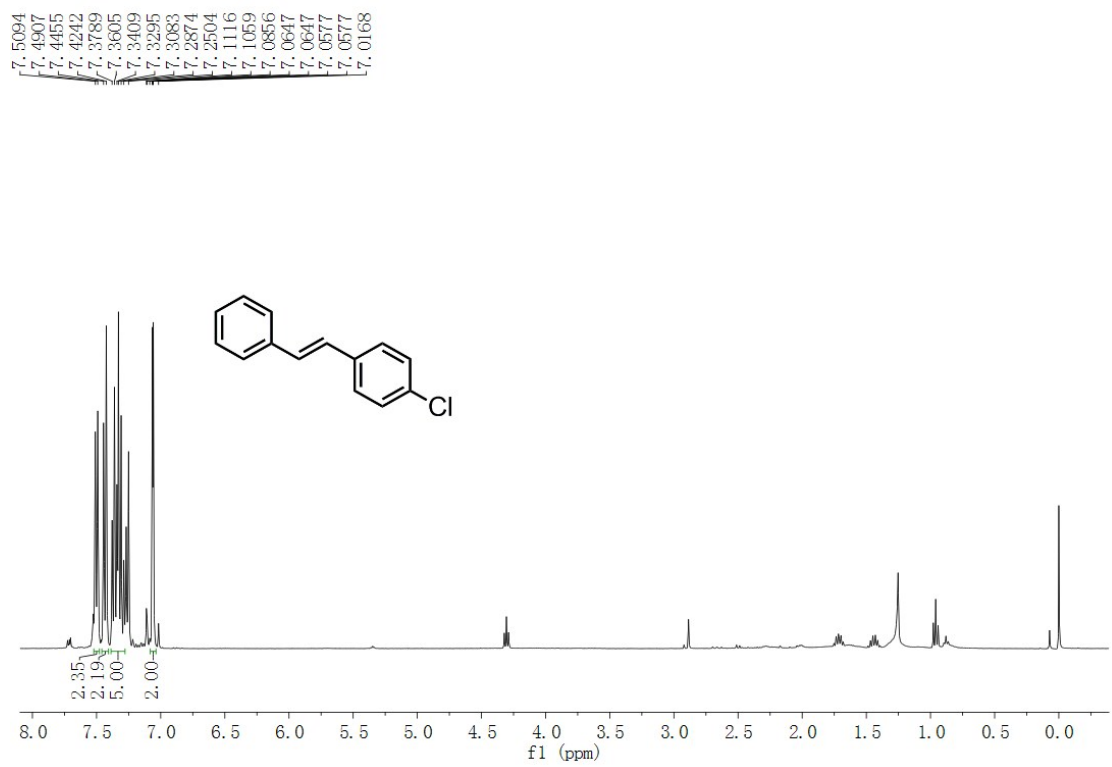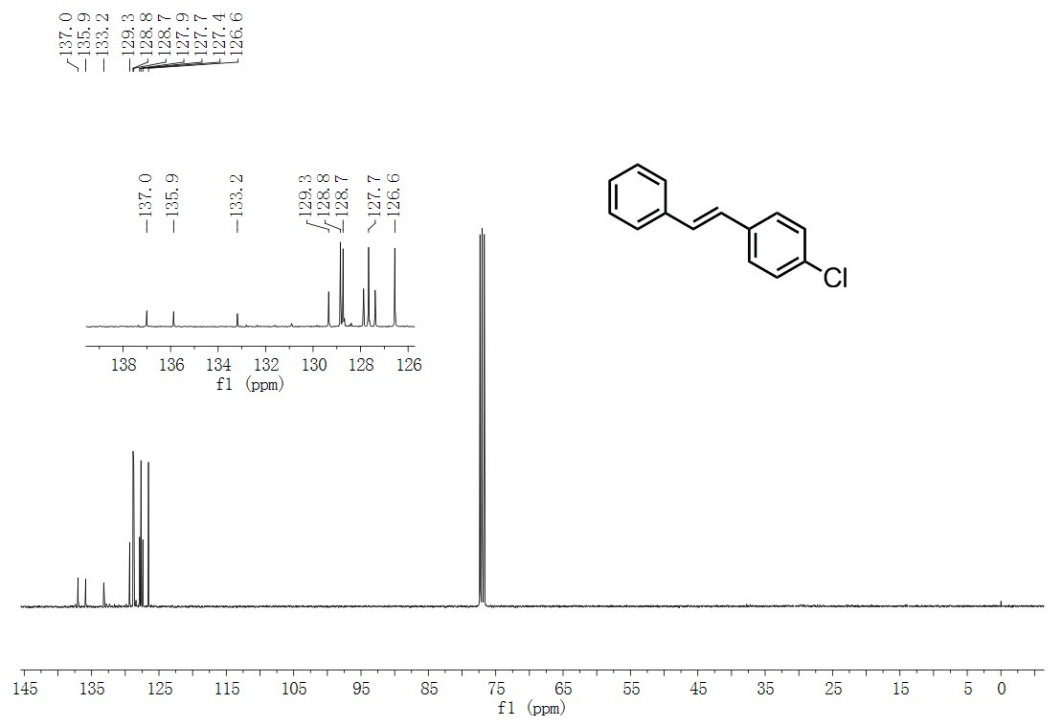

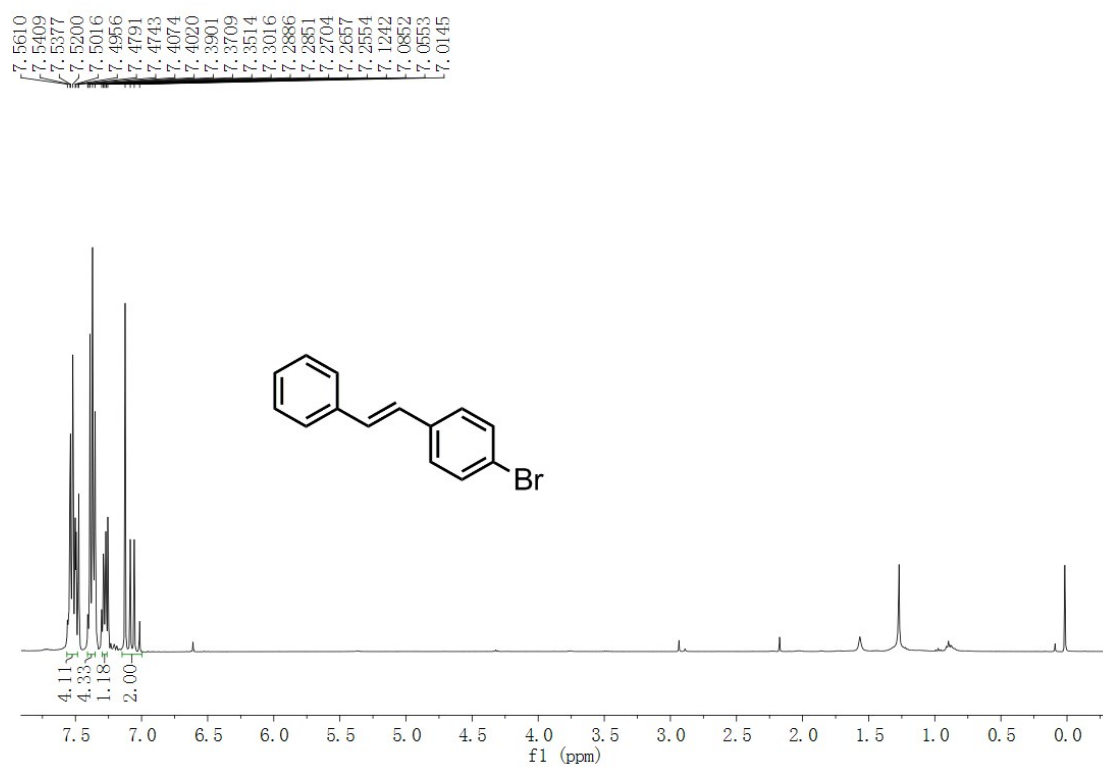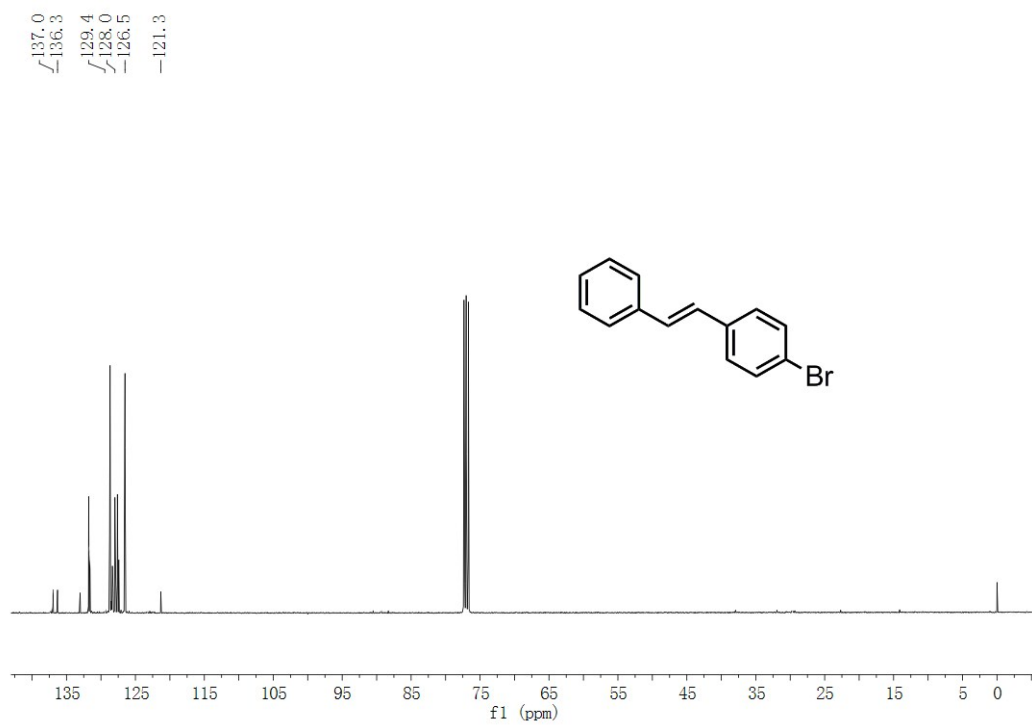

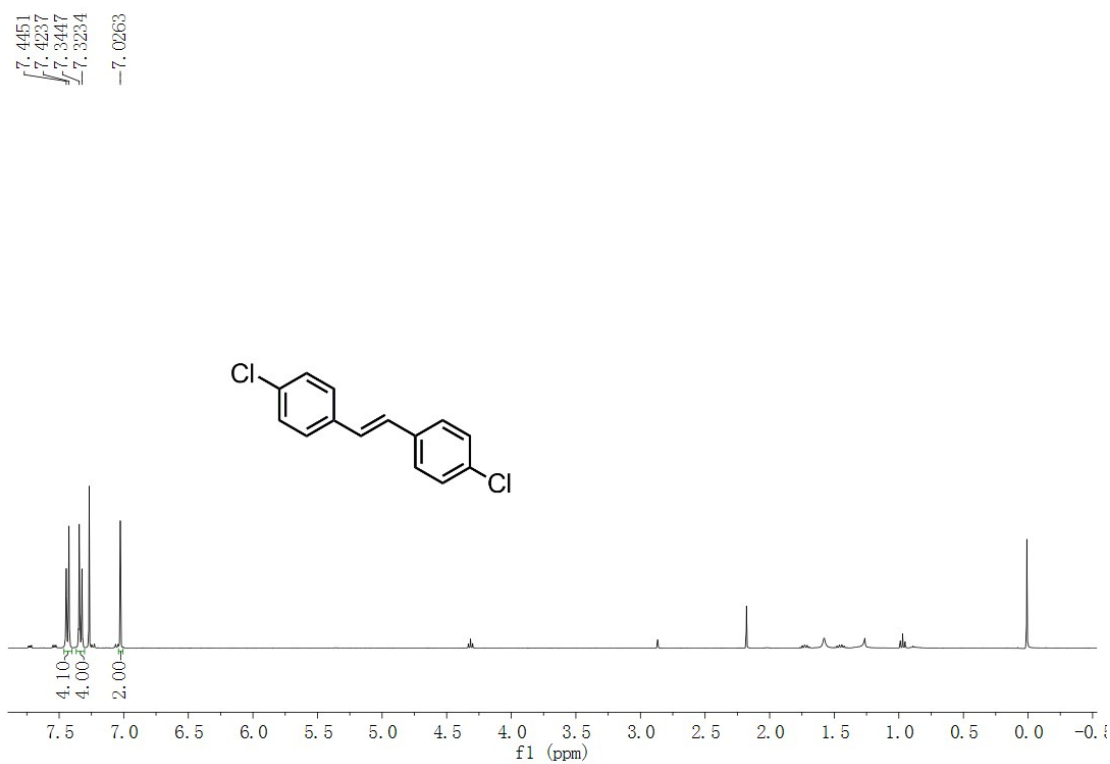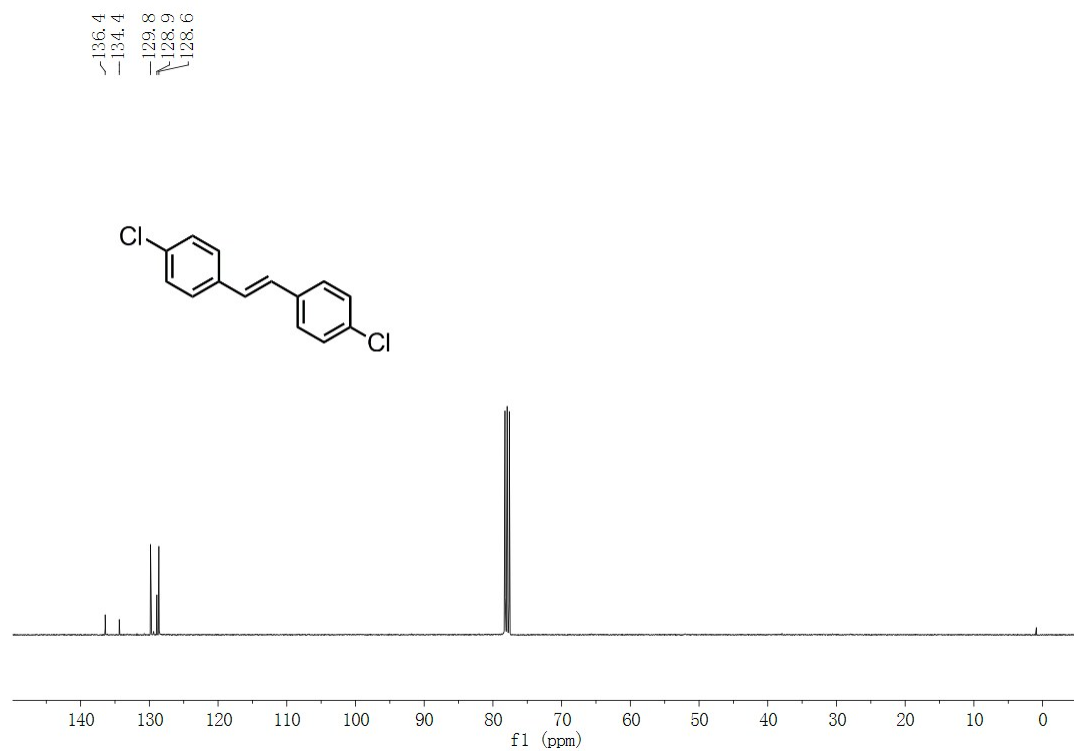

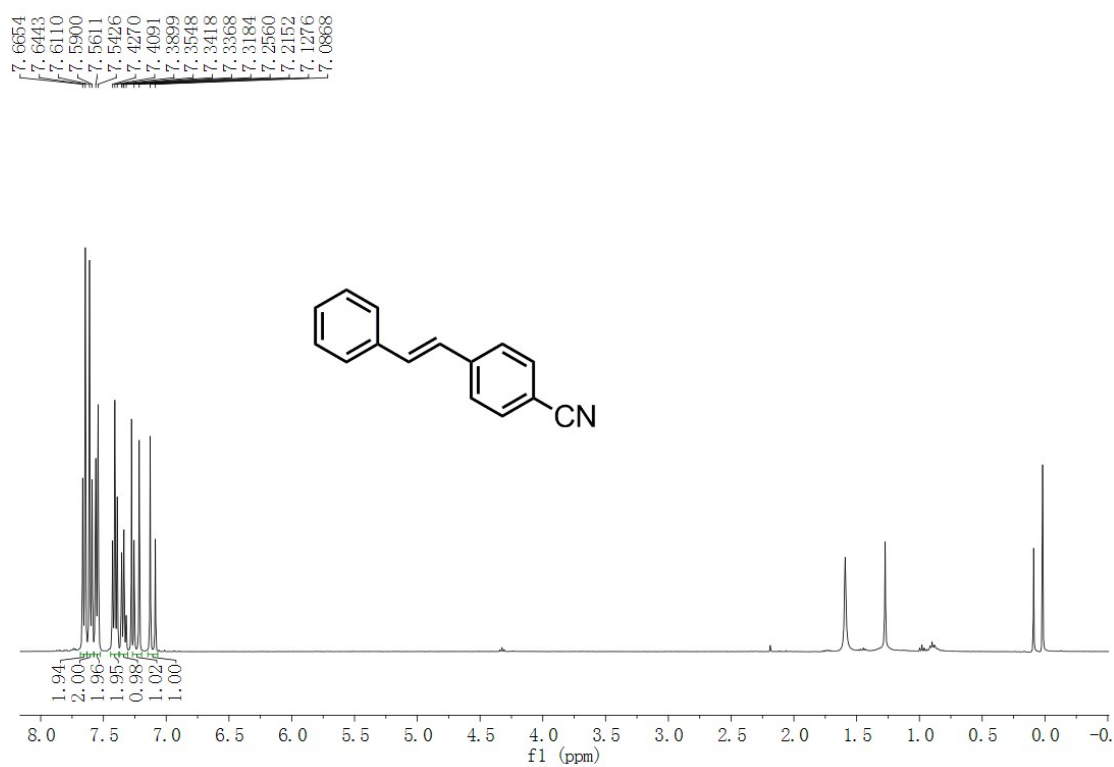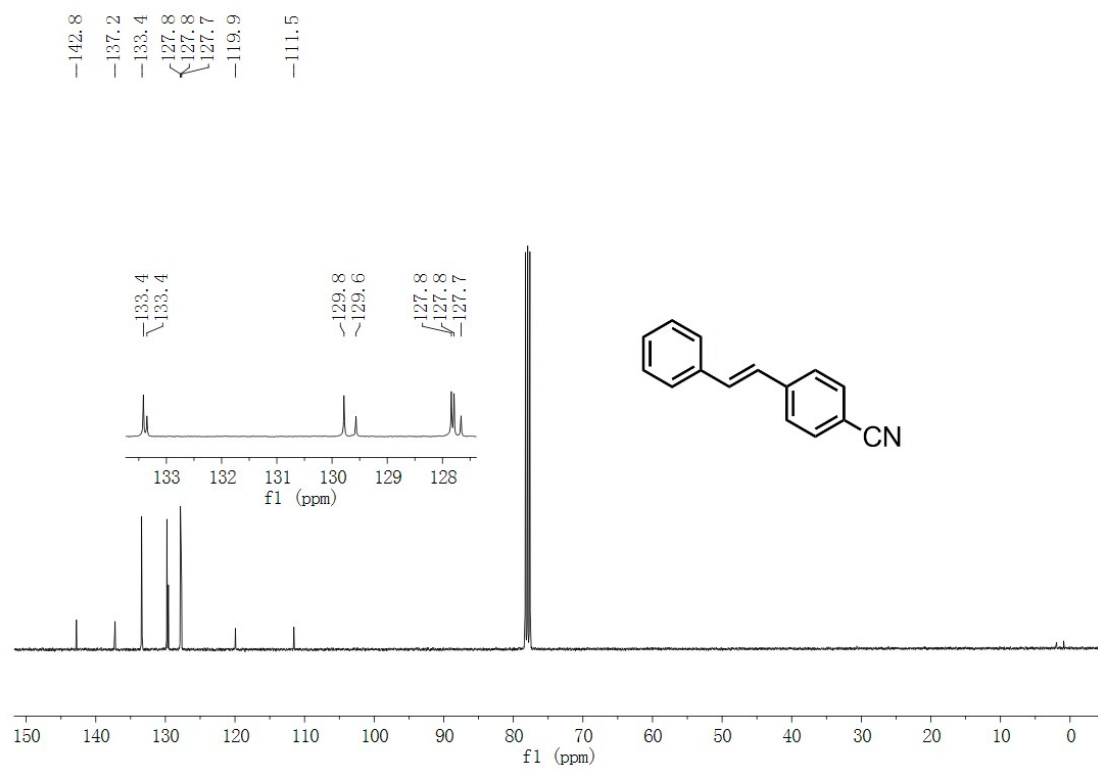

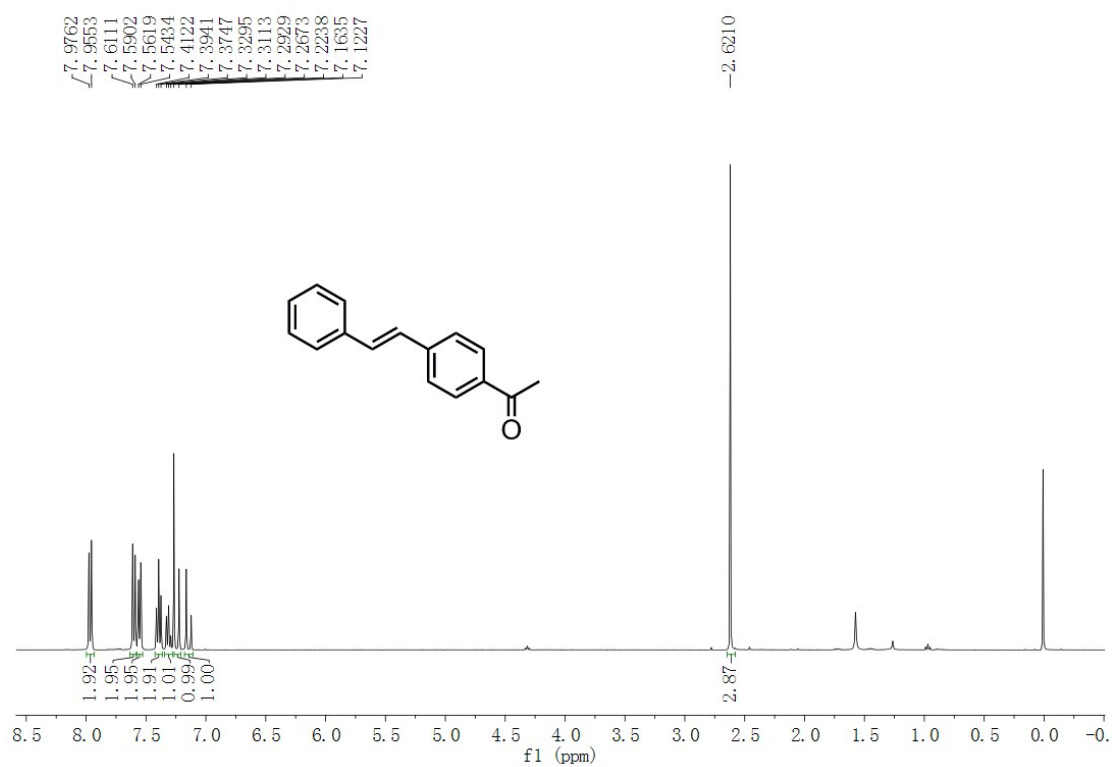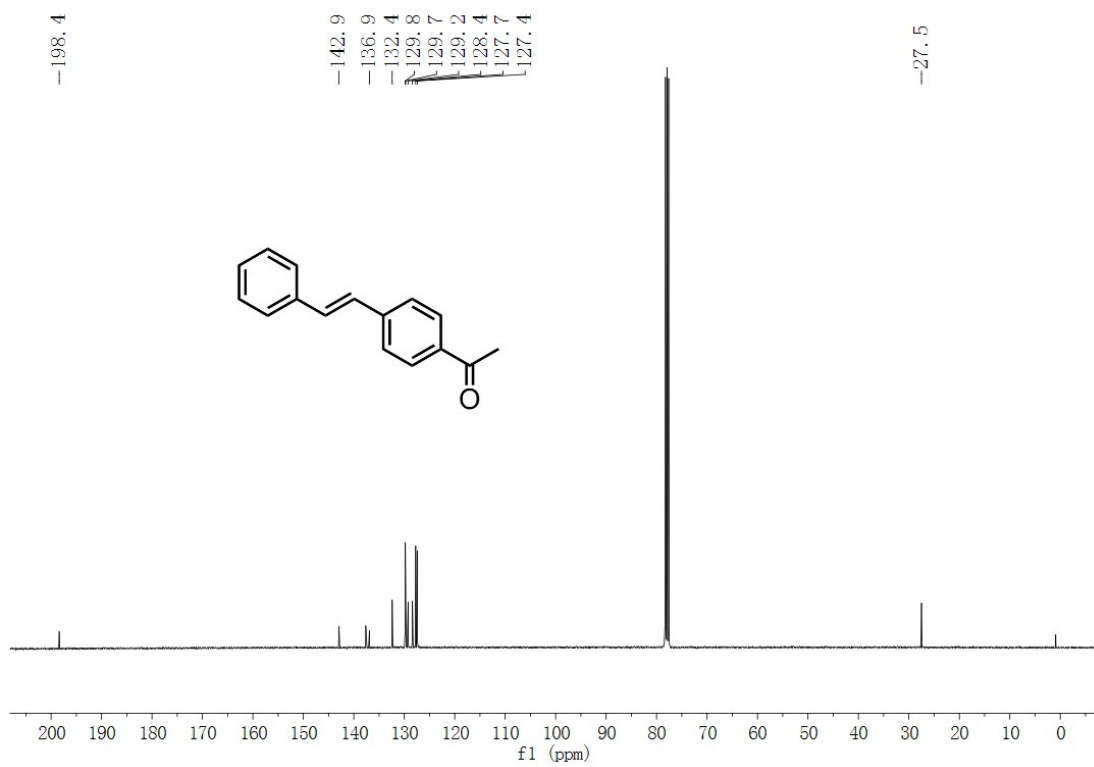

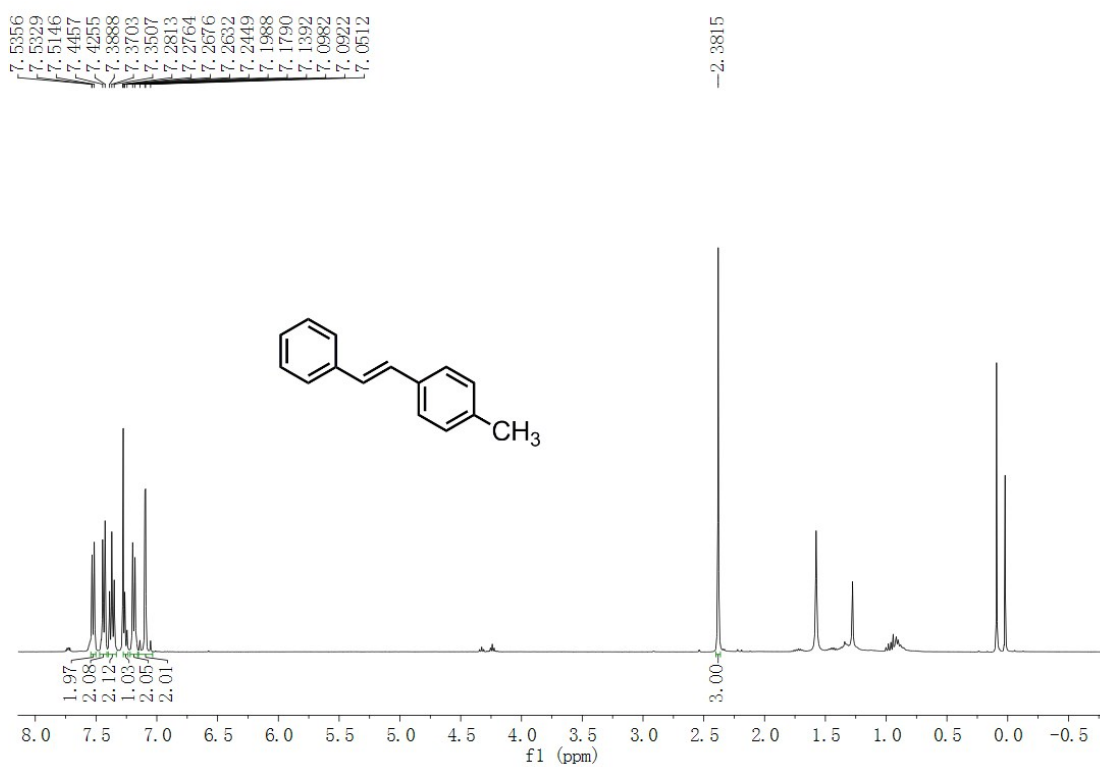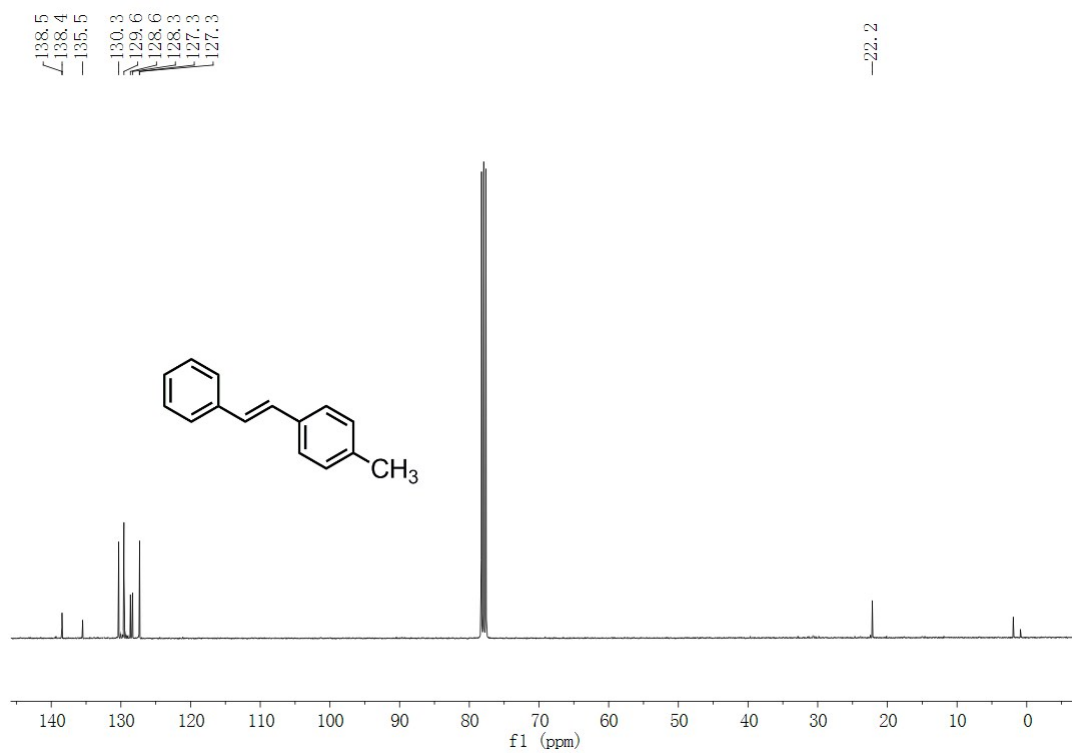

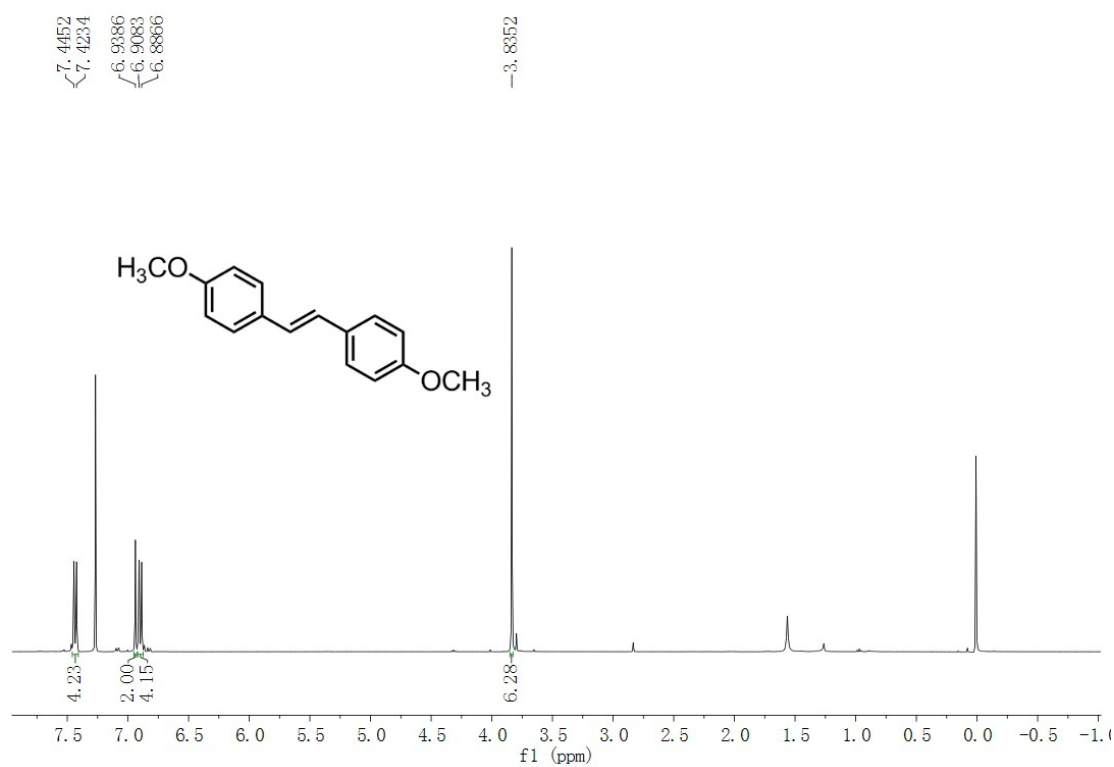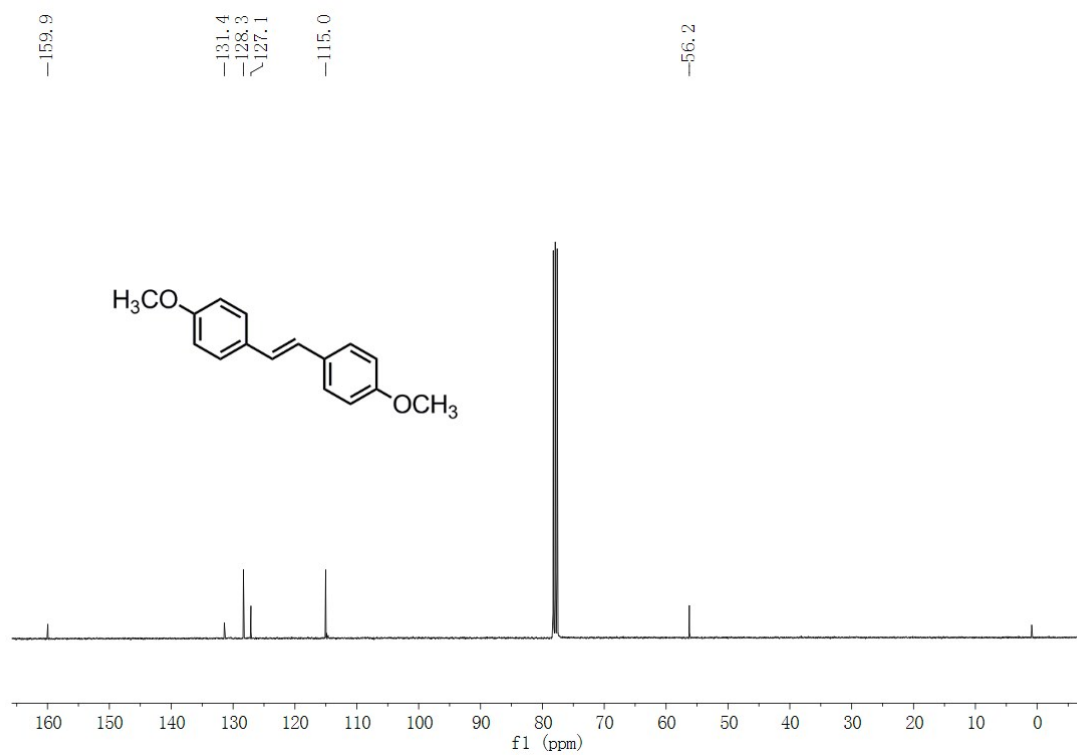



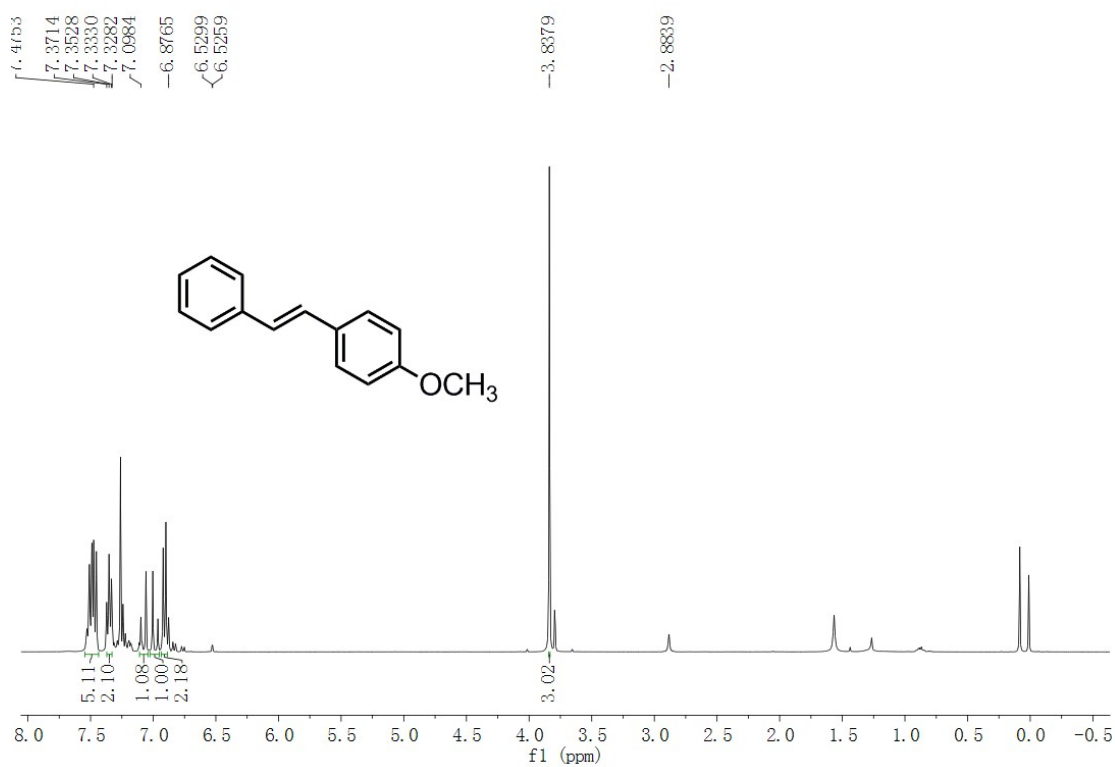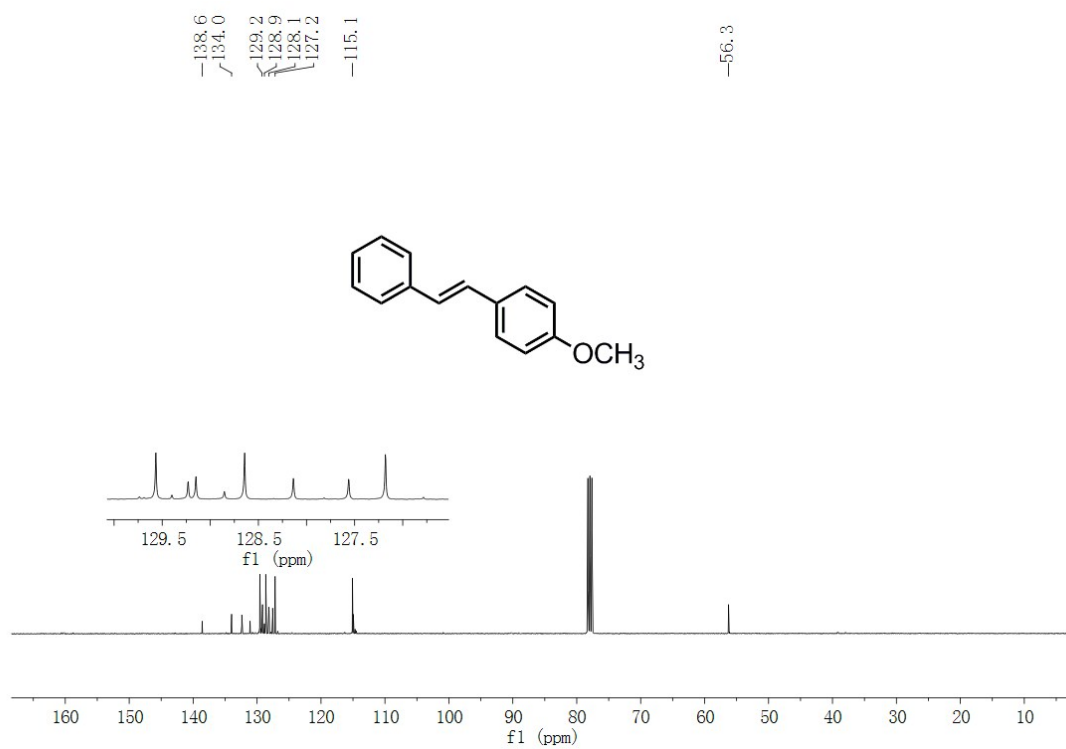

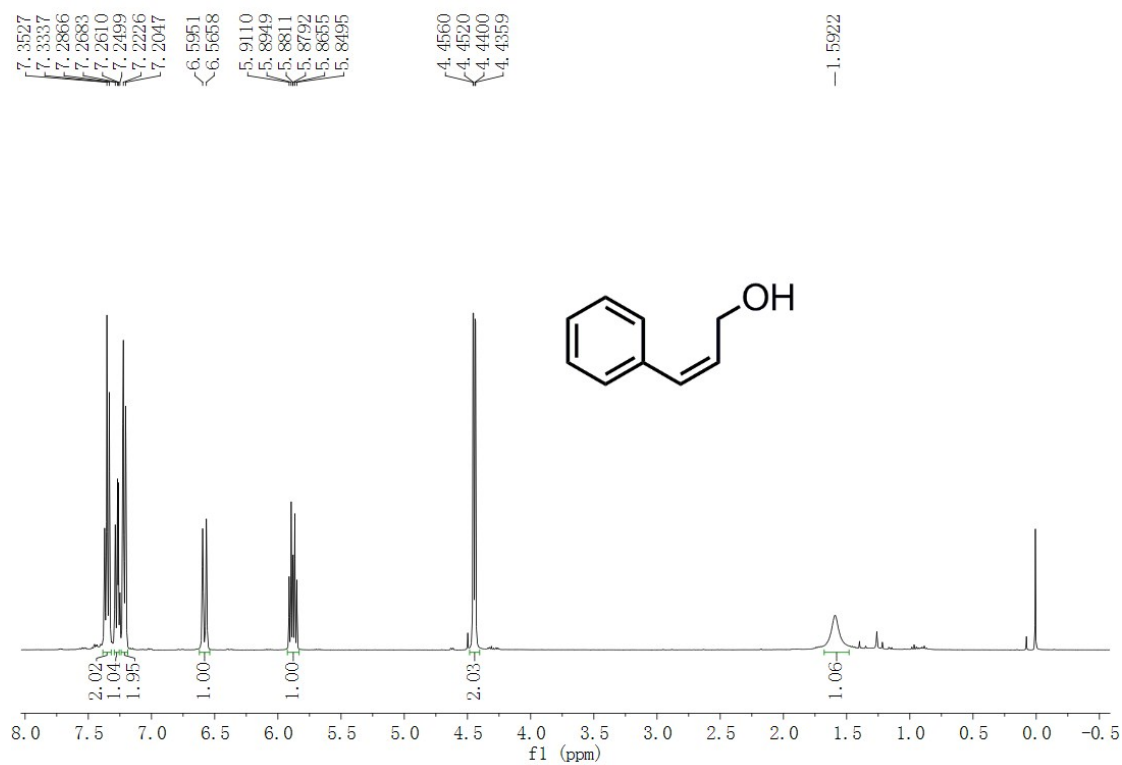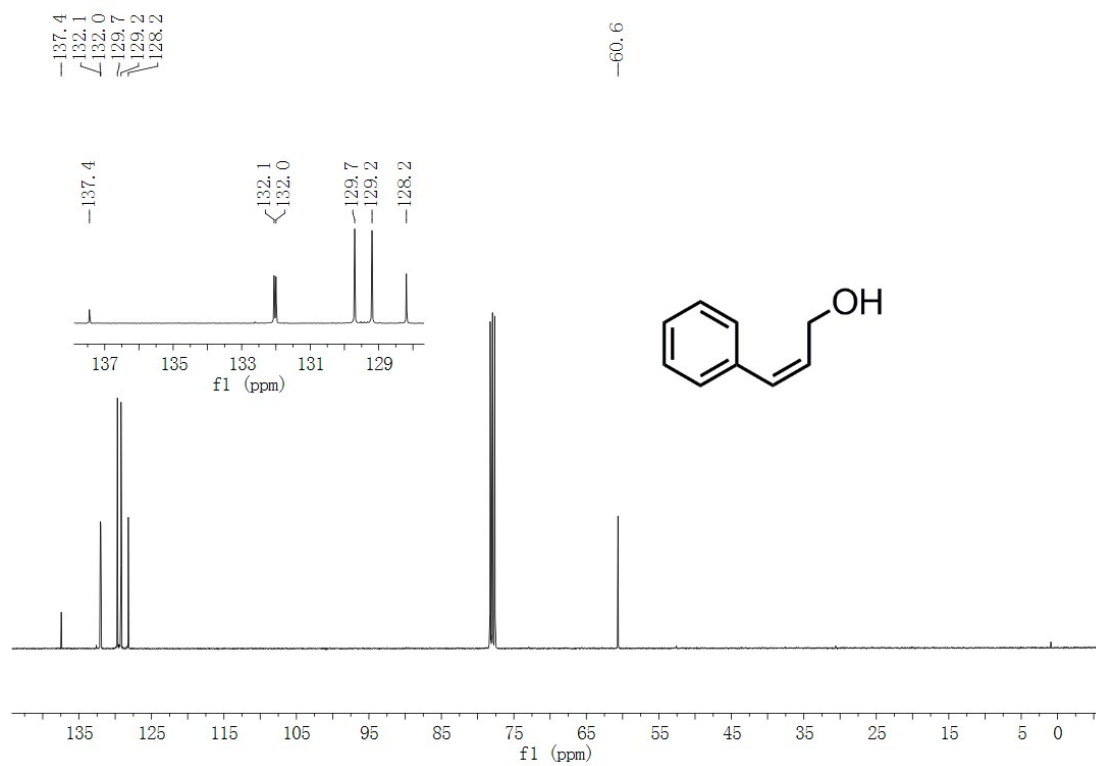

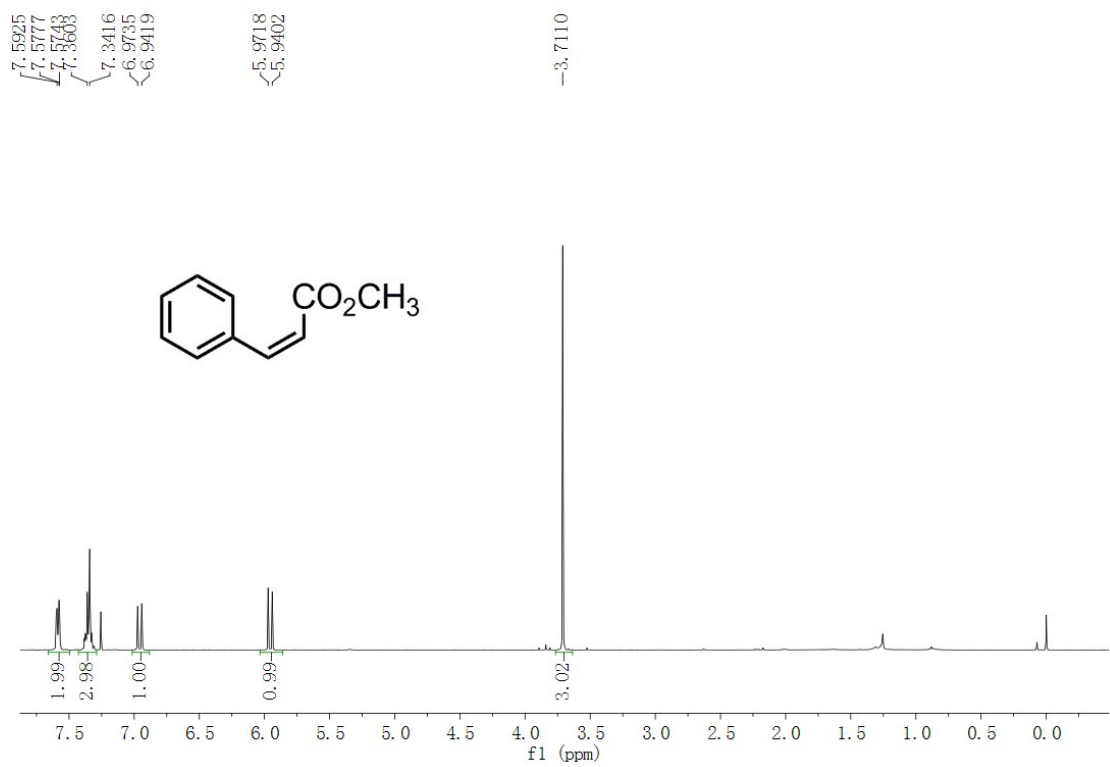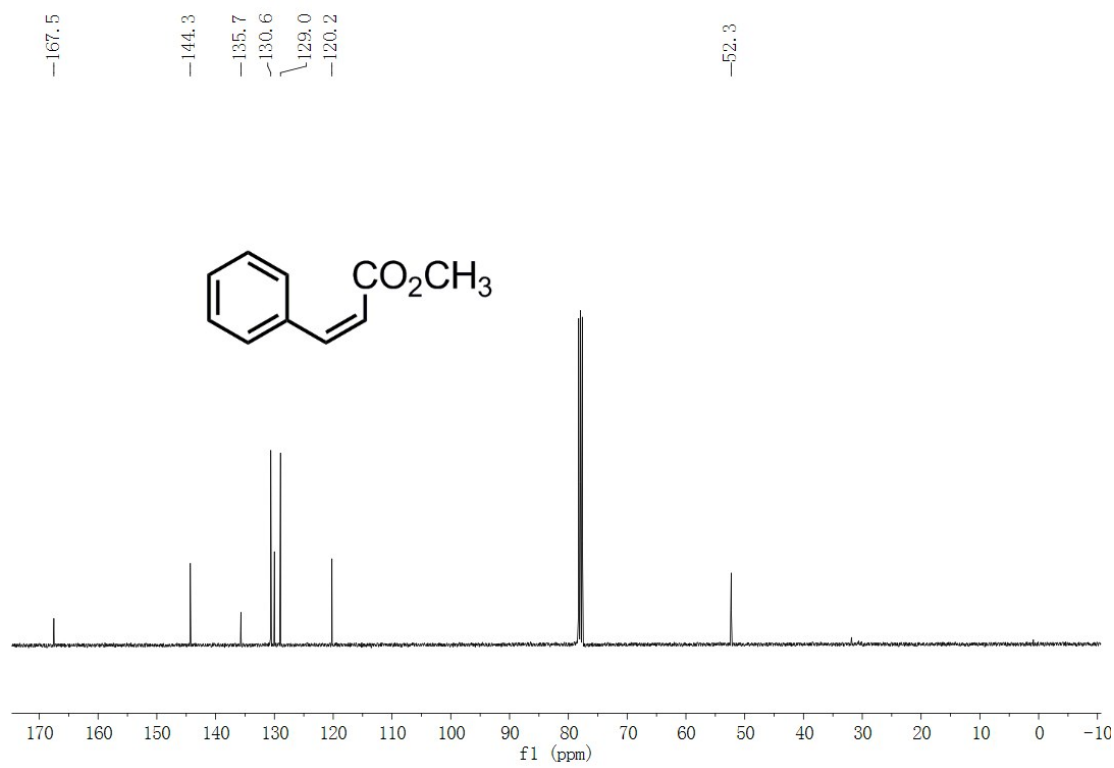

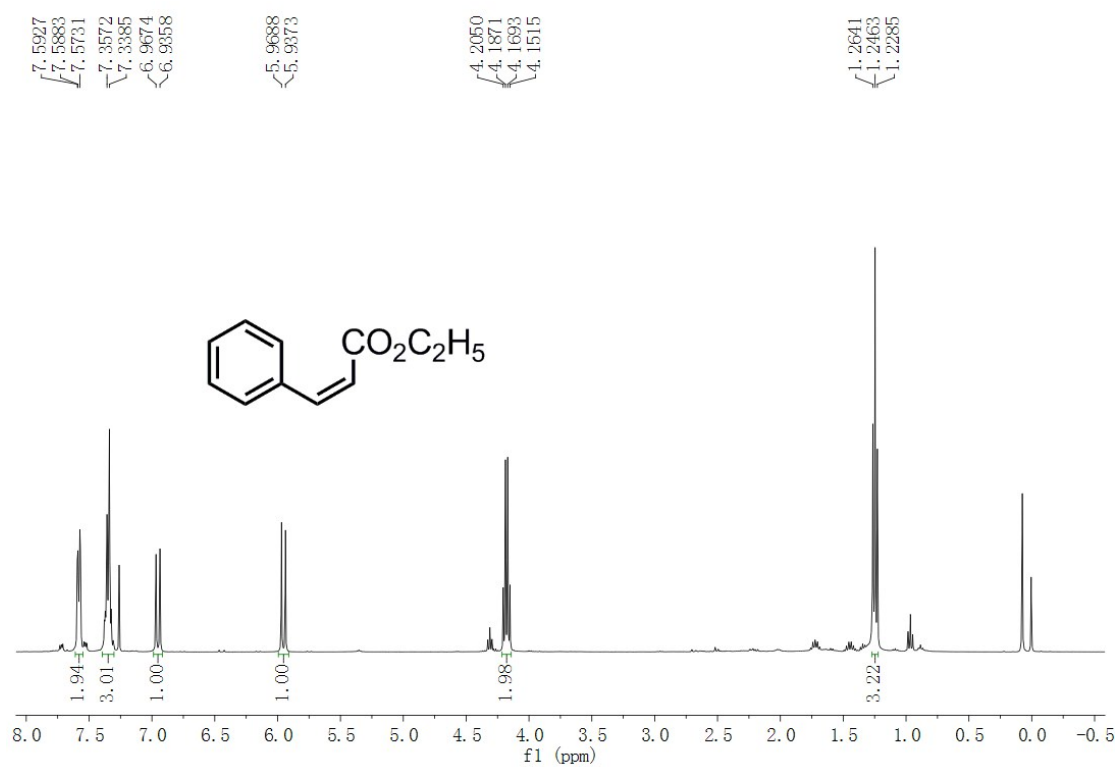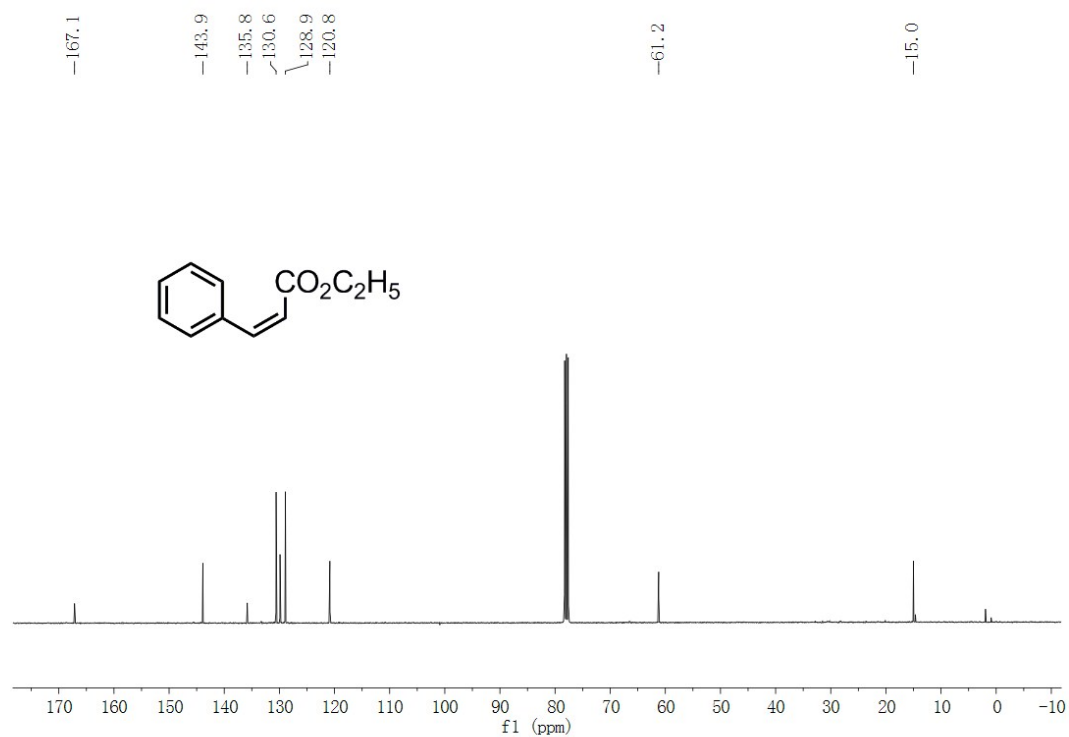

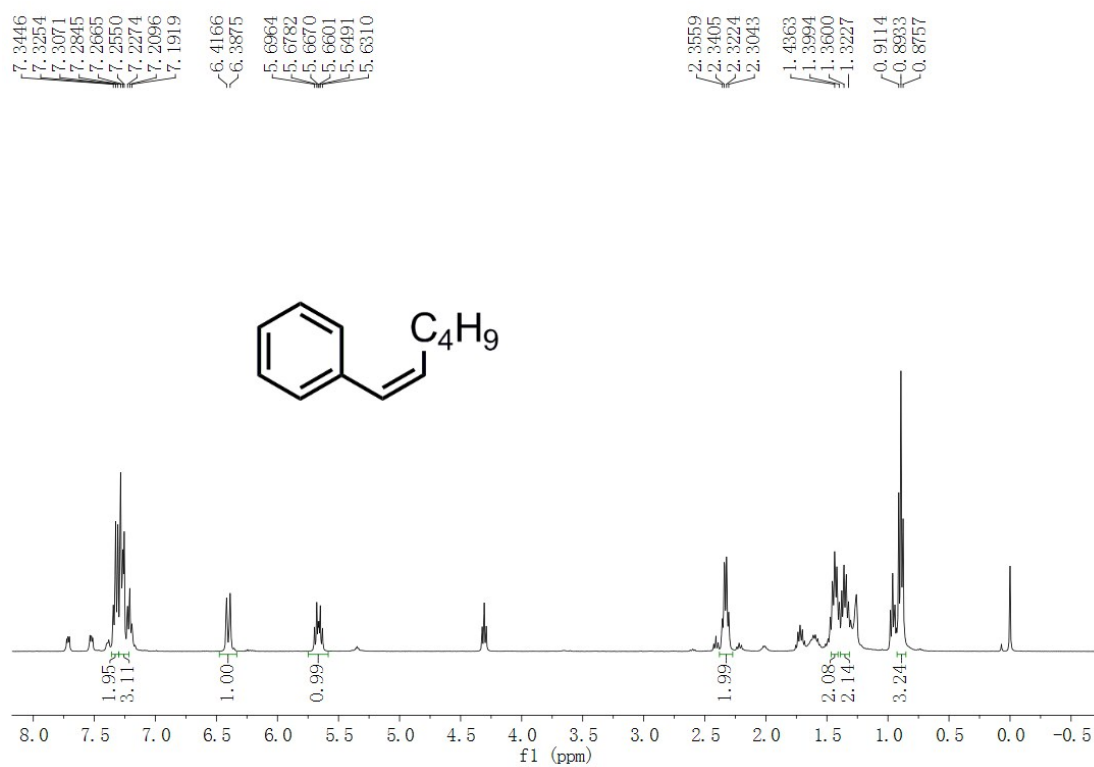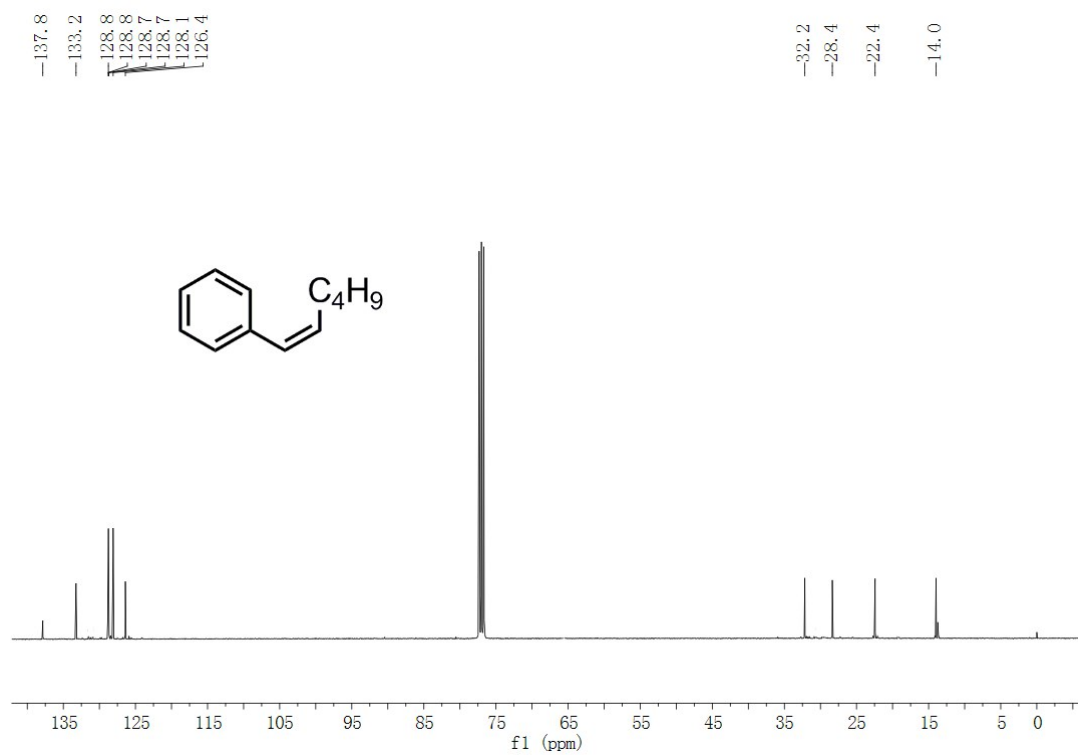

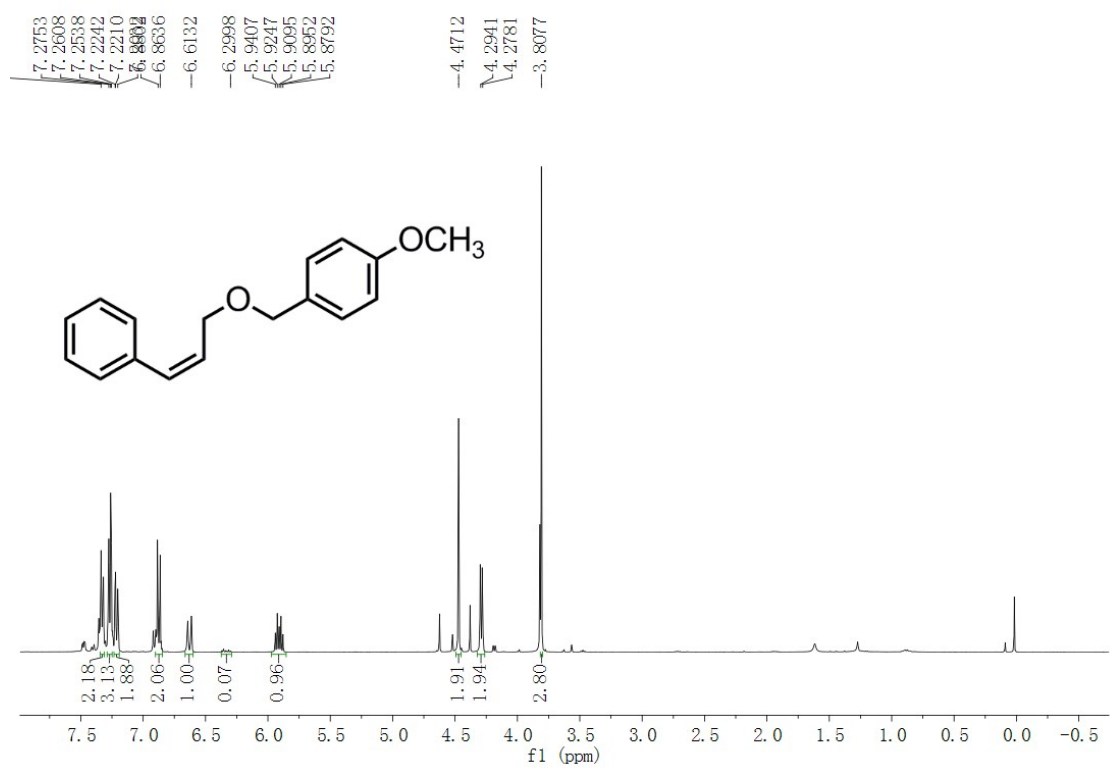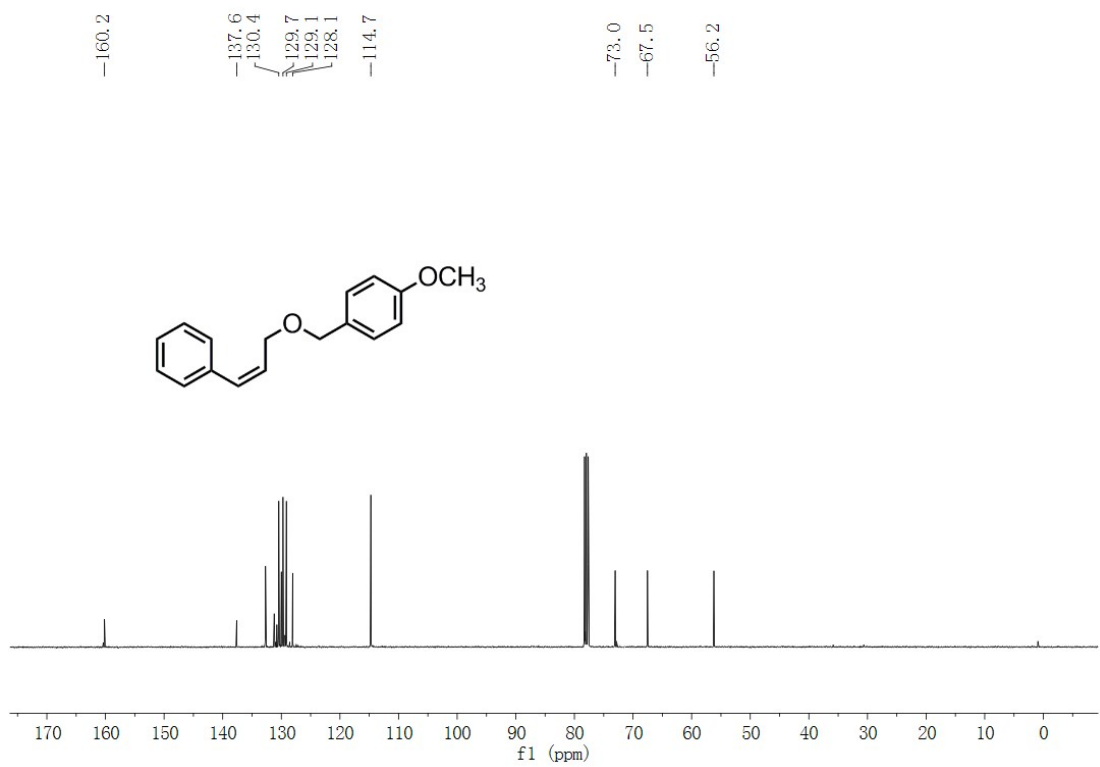

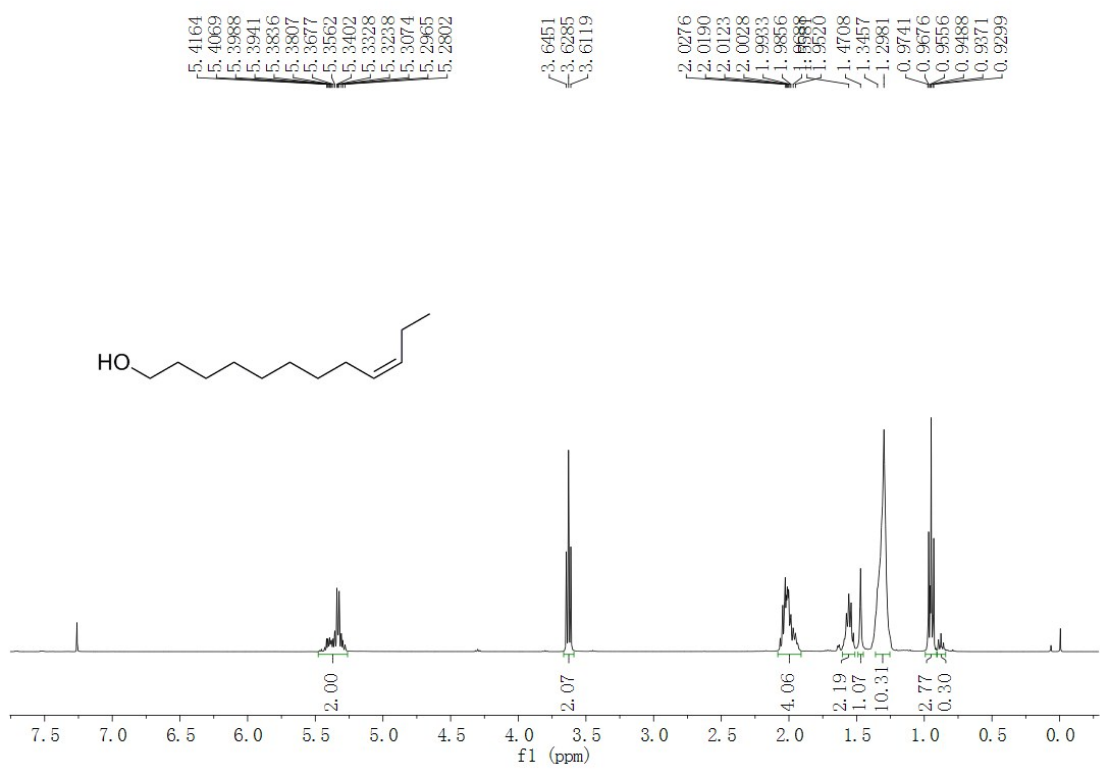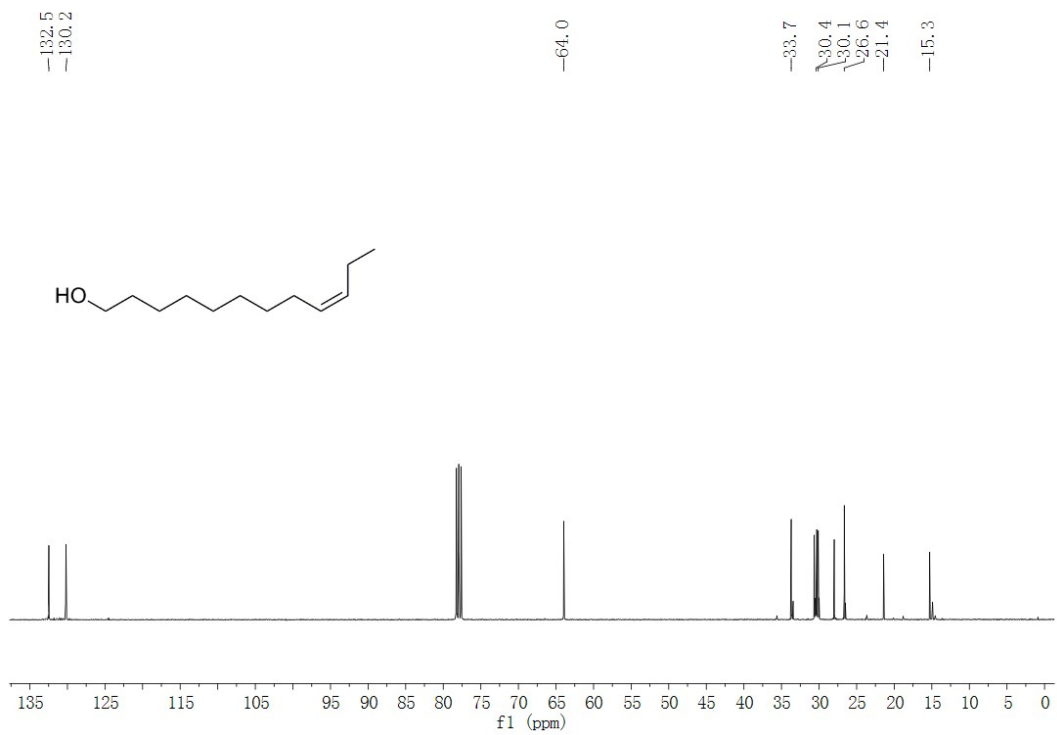

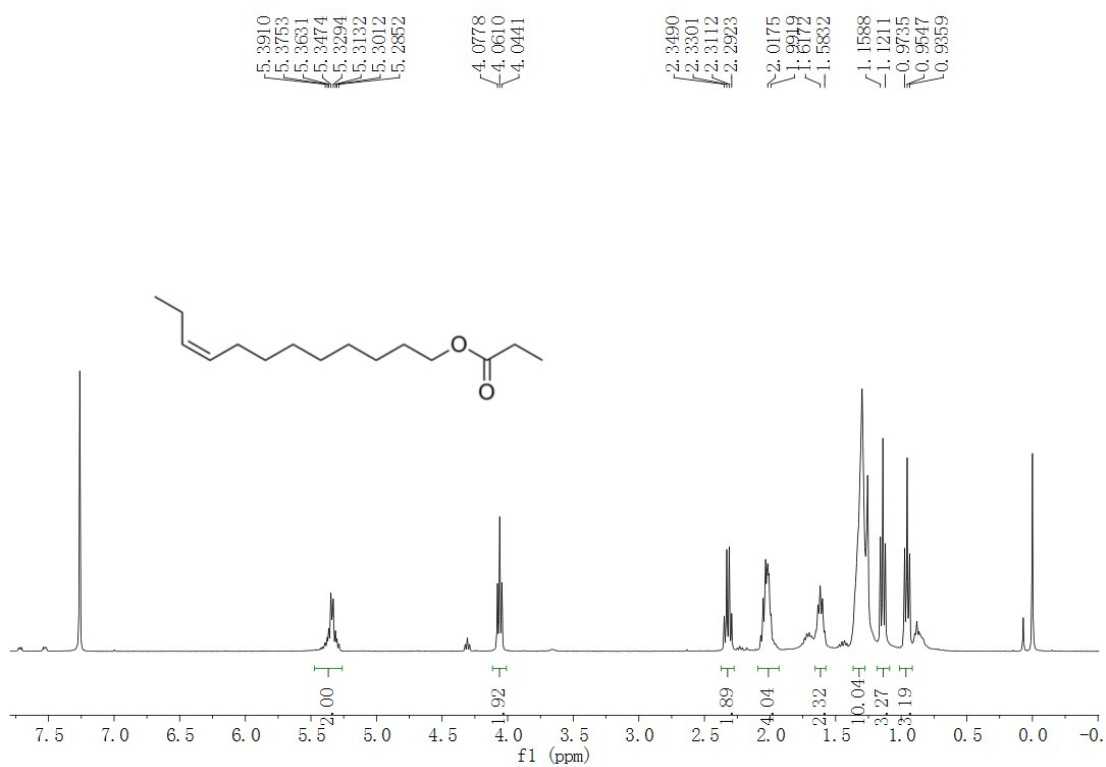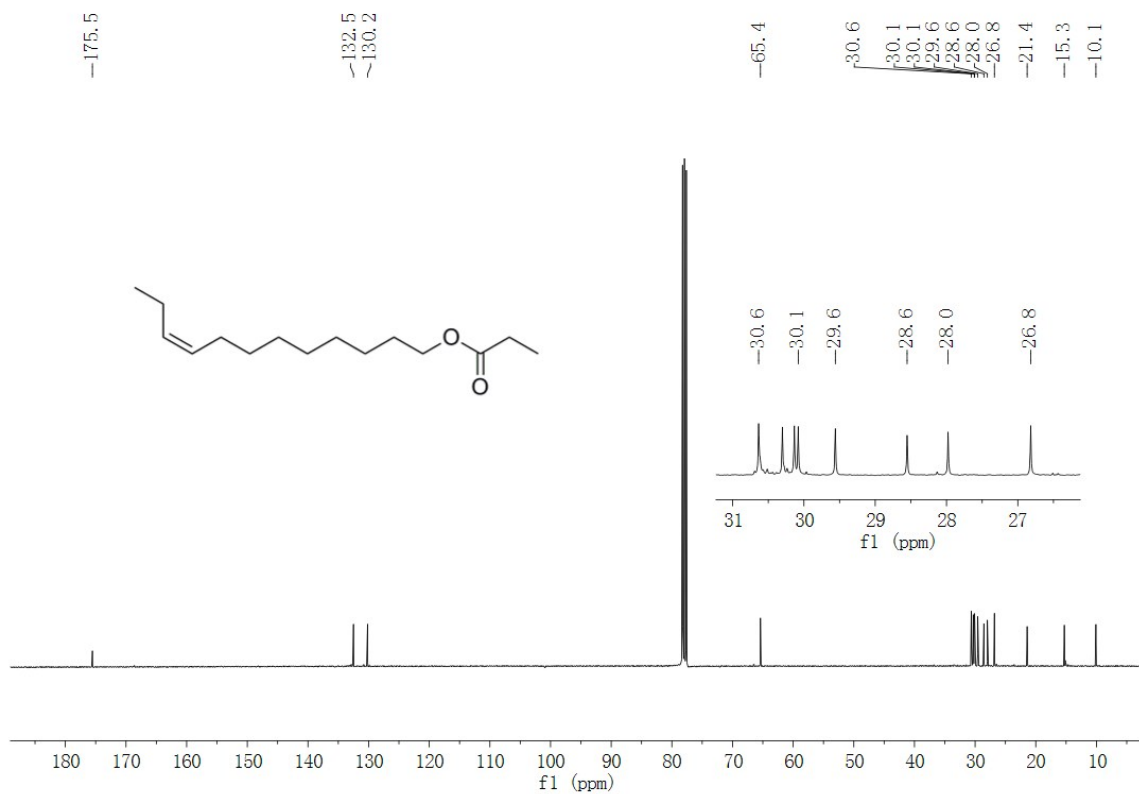

Supplement: c5cc08697c1.pdf [file c5cc08697c1.pdf]
